# Supplementary material for: Prenylated Flavonoids with Potential Antimicrobial Activity: Synthesis, Biological Activity, and In Silico Study
Source: MDPI journal article supplement (doi:10.3390/ijms22115472), 2021-05-22
Supplement: s1 [file s1]

# Synthesis and Antimicrobial Activity of Prenylated Flavonoids

Mauricio Osorio<sup>1\*</sup>, Marcela Carvajal<sup>2</sup>, Alejandra Vergara<sup>2</sup>, Estefania Butassi<sup>3</sup>, Susana Zacchino<sup>3</sup>, Carolina Mascayano<sup>4</sup>, Margarita Montoya<sup>5</sup>, Sophia Mejías<sup>5</sup>, Marcelo Cortez-San Martín<sup>6</sup>, and Yesseny Vásquez-Martínez<sup>7\*</sup>

<sup>1</sup>H- and <sup>13</sup>C –NMR spectra of obtained prenylated compounds

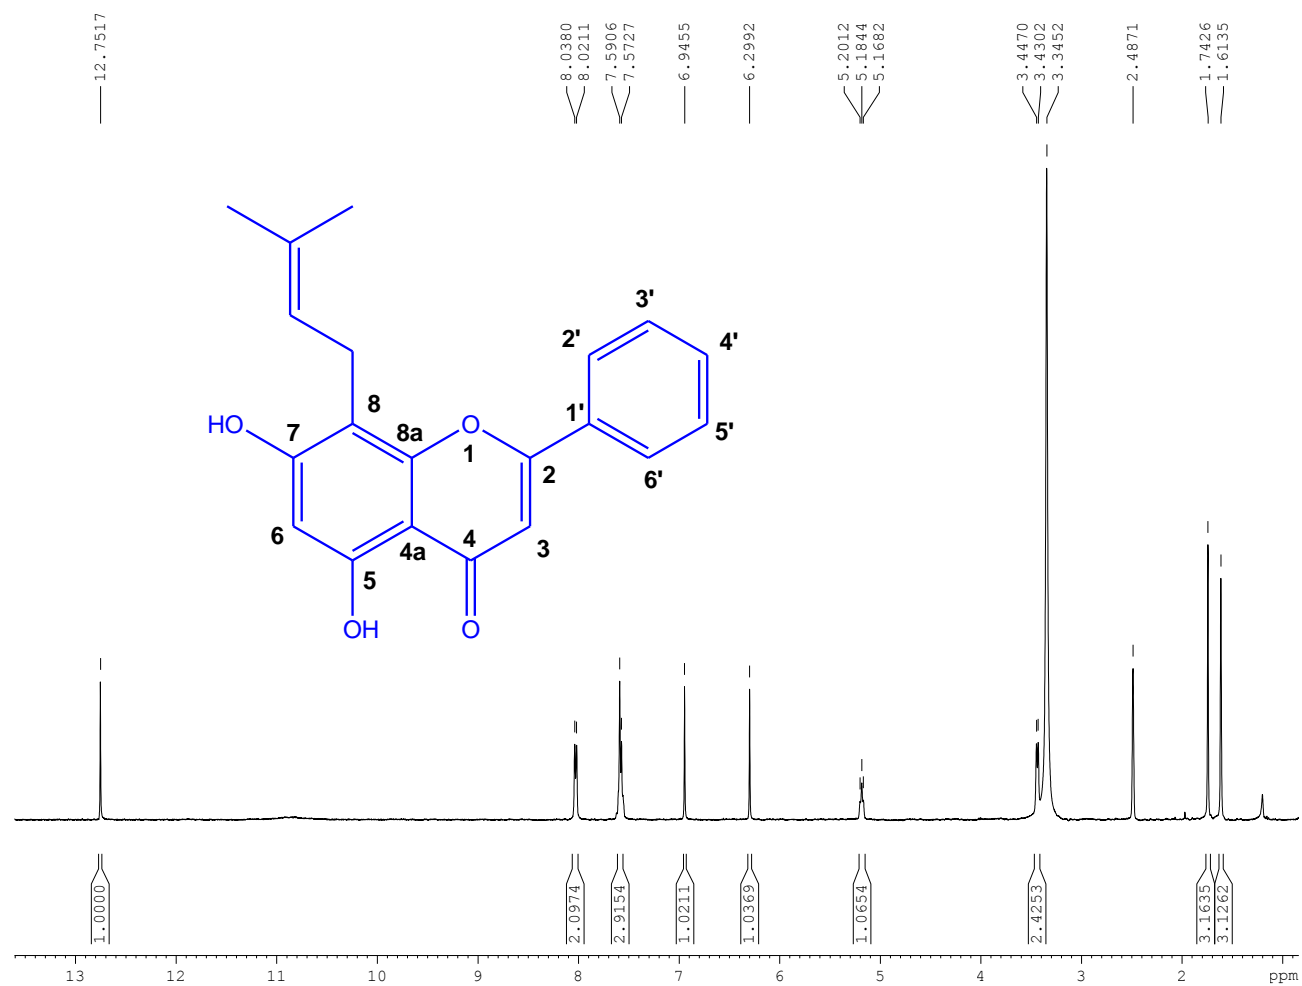

**Figure S1.**  $^1\text{H}$  NMR (400 MHz,  $\text{DMSO}-d_6$ ) spectrum of **7**.  $\delta$  ppm: 12.75 (s, 1H, ArOH-5); 10.6 – 11.0 (br s, 1H, ArOH-7); 8.03 (d, 2H,  $J$  = 6.8 Hz, 2',6'-ArH); 7.59-7.57 (m, 3H, 3',4',5'-ArH); 6.95 (s, 1H, ArH-3); 6.30 (s, 1H, ArH-6); 5.18 (br t, 1H,  $\text{CH}=\text{C}(\text{CH}_3)_2$ ); 3.44 (d, 2H,  $J$  = 6.7 Hz,  $\text{CH}_2\text{CH}=\text{C}(\text{CH}_3)_2$ ); 1.74 (s, 3H,  $-\text{CH}_2\text{CH}=\text{CCH}_3\text{CH}_3$ ); 1.61 (s, 3H,  $-\text{CH}_2\text{CH}=\text{CCH}_3\text{CH}_3$ ).

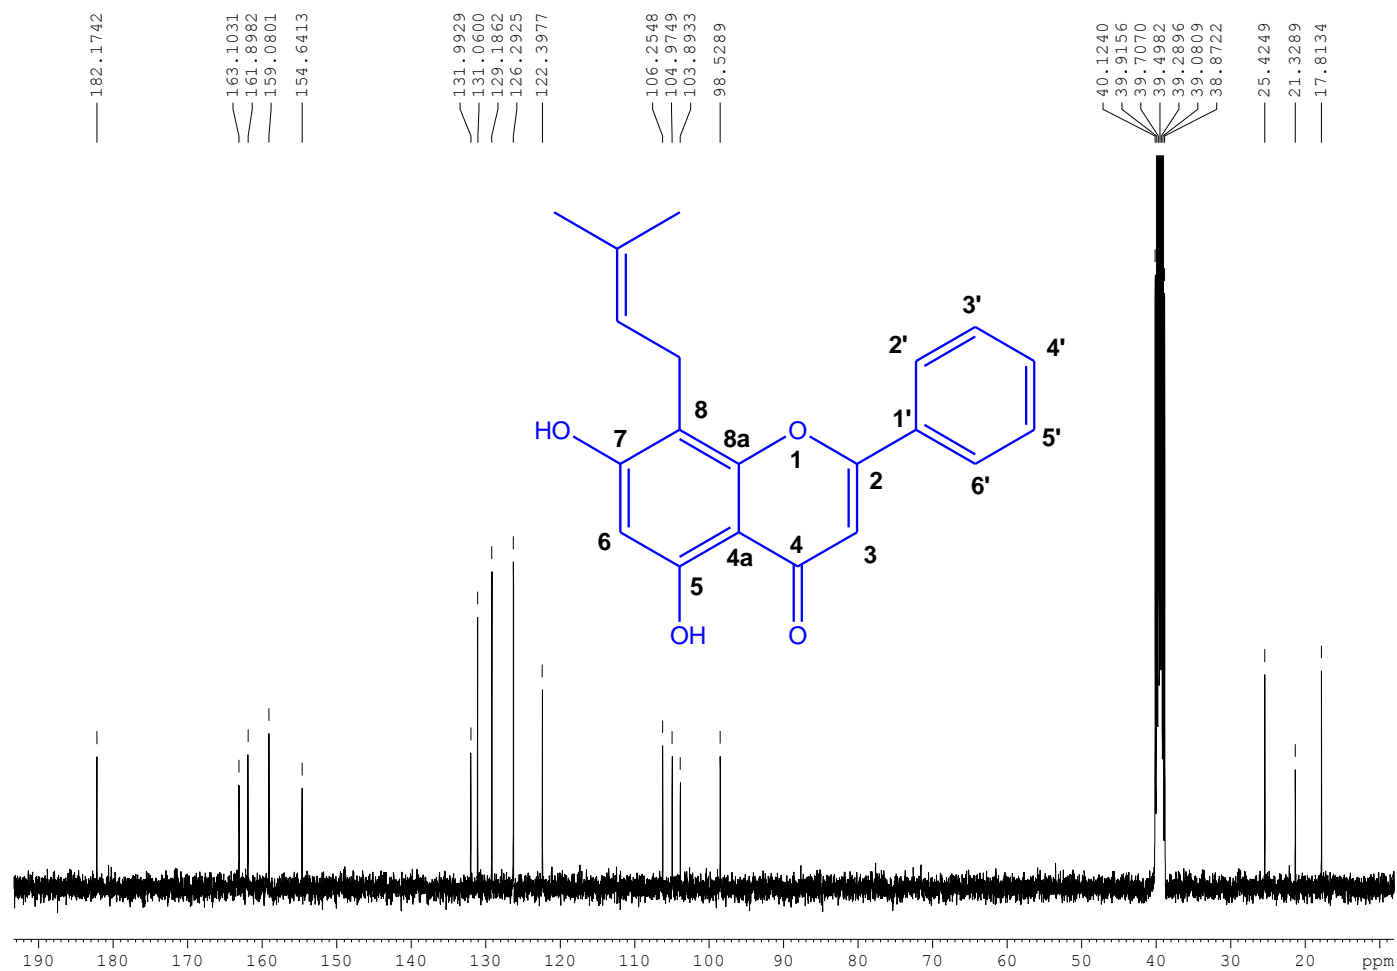

**Figure S2.** <sup>13</sup>C NMR (100 MHz, DMSO-*d*<sub>6</sub>) spectrum of 7. δ ppm: 17.8 (-CH=CCH<sub>3</sub>CH<sub>3</sub>); 21.3 (-CH<sub>2</sub>CH=CCH<sub>3</sub>CH<sub>3</sub>); 25.4 (CH<sub>2</sub>CH=CCH<sub>3</sub>CH<sub>3</sub>); 98.5 (ArC-6); 103.9 (ArC-4a); 105.0 (ArC-3); 106.3 (ArC-8); 122.4 (CH=C(CH<sub>3</sub>)<sub>2</sub>); 126.3 (ArC-2',6'); 129.2 (ArC-3',5'); 131.1 (CH=C(CH<sub>3</sub>)<sub>2</sub>); 132.0 (ArC-4'); 154.6 (ArC-8a); 159.1 (ArC-5); 161.9 (ArC-7); 163.1 (ArC-2); 182.2 (4-C=O).

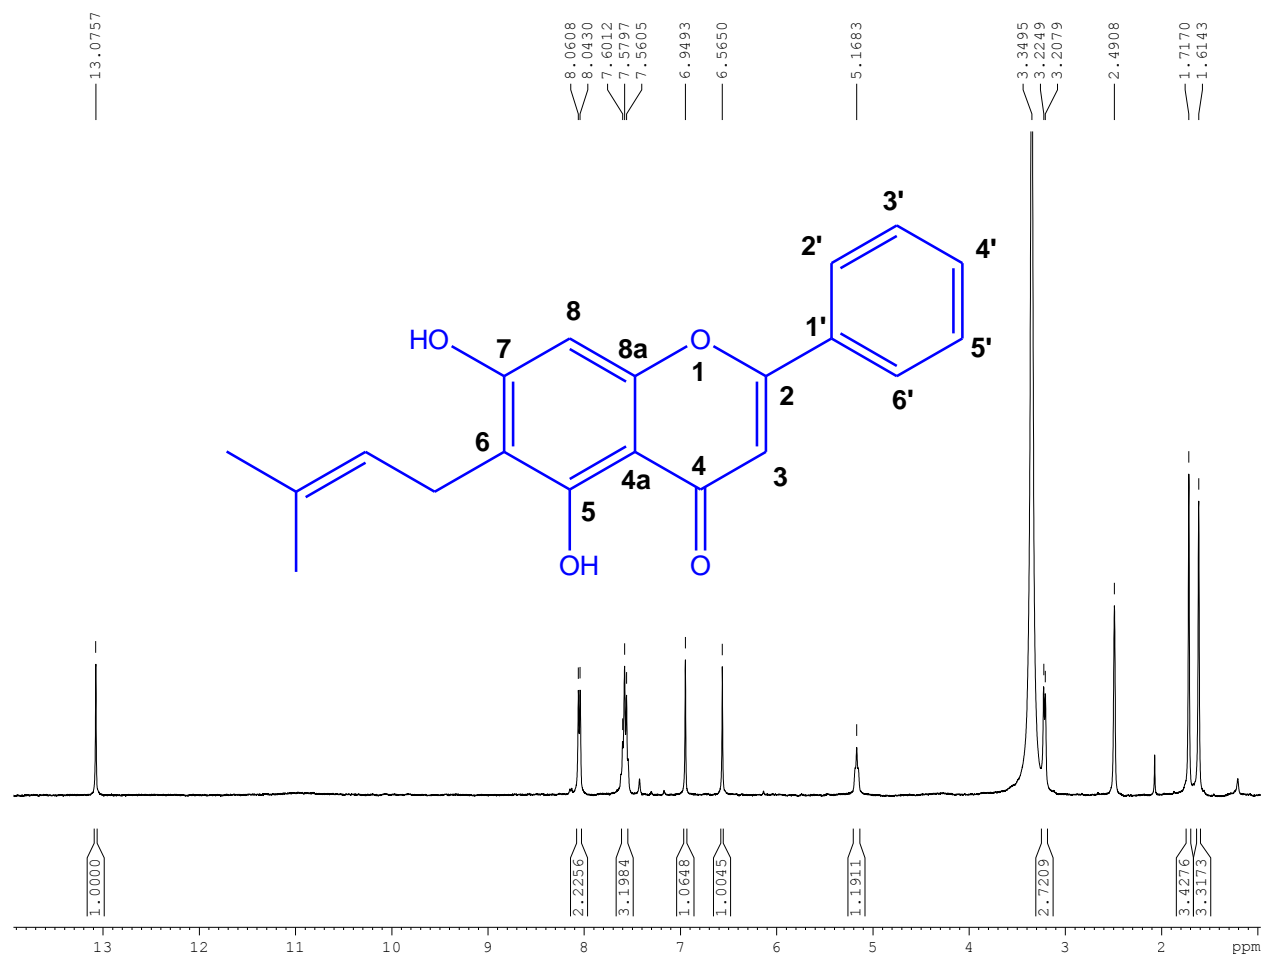

**Figure S3.**  $^1\text{H}$  NMR (400 MHz,  $\text{DMSO}-d_6$ ) spectrum of **8**.  $\delta$  ppm: 13.08 (s, 1H, ArOH-5); 8.05 (d, 2H,  $J = 7.1$  Hz, 2',6'-ArH); 7.60-7.56 (m, 3H, 3',4',5'-ArH); 6.95 (s, 1H, ArH-3); 6.57 (s, 1H, ArH-6); 5.17 (br t, 1H,  $\text{CH}=\text{C}(\text{CH}_3)_2$ ); 3.22 (d, 2H,  $J = 6.8$  Hz,  $\text{CH}_2\text{CH}=\text{C}(\text{CH}_3)_2$ ); 1.72 (s, 3H,  $-\text{CH}_2\text{CH}=\text{CCH}_3\text{CH}_3$ ); 1.61 (s, 3H,  $-\text{CH}_2\text{CH}=\text{CCH}_3\text{CH}_3$ ).

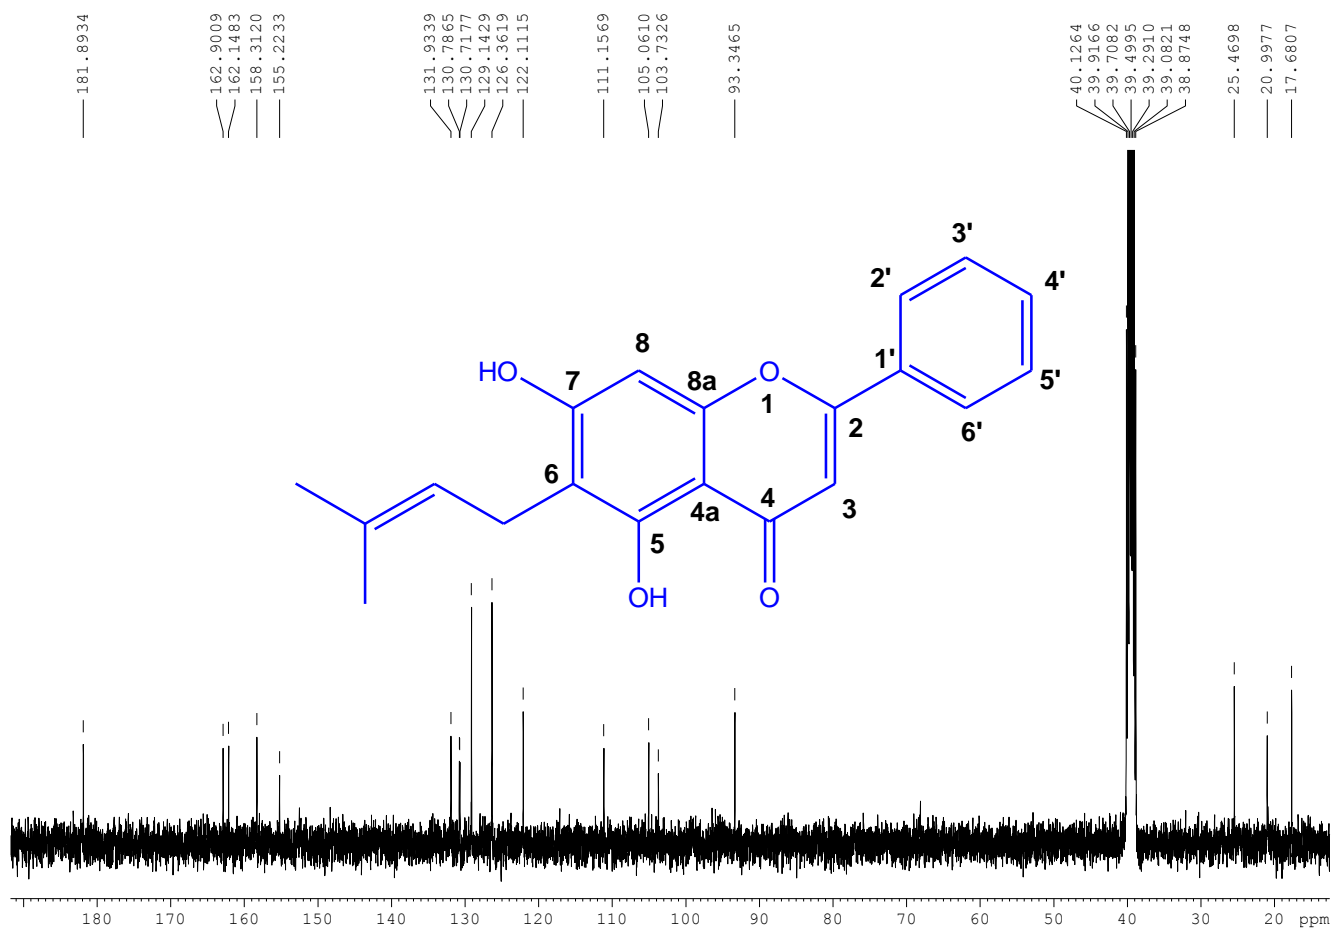

**Figure S4.**  $^{13}\text{C}$  NMR (100 MHz,  $\text{DMSO-}d_6$ ) spectrum of 8.  $\delta$  ppm: 17.7 (-CH=CCH<sub>3</sub>CH<sub>3</sub>); 21.0 (-CH<sub>2</sub>CH=CCH<sub>3</sub>CH<sub>3</sub>); 25.5 (CH<sub>2</sub>CH=CCH<sub>3</sub>CH<sub>3</sub>); 93.4 (ArC-8); 103.7 (ArC-4a); 105.0 (ArC-3); 111.2 (ArC-6); 122.1 (CH=C(CH<sub>3</sub>)<sub>2</sub>); 126.4 (ArC-2',6'); 129.1 (ArC-3',5'); 130.7 (CH=C(CH<sub>3</sub>)<sub>2</sub>); 130.8 (ArC-1'); 131.9 (ArC-4'); 155.2 (ArC-8a); 158.3 (ArC-5); 162.2 (ArC-7); 162.9 (ArC-2); 181.9 (4-C=O).

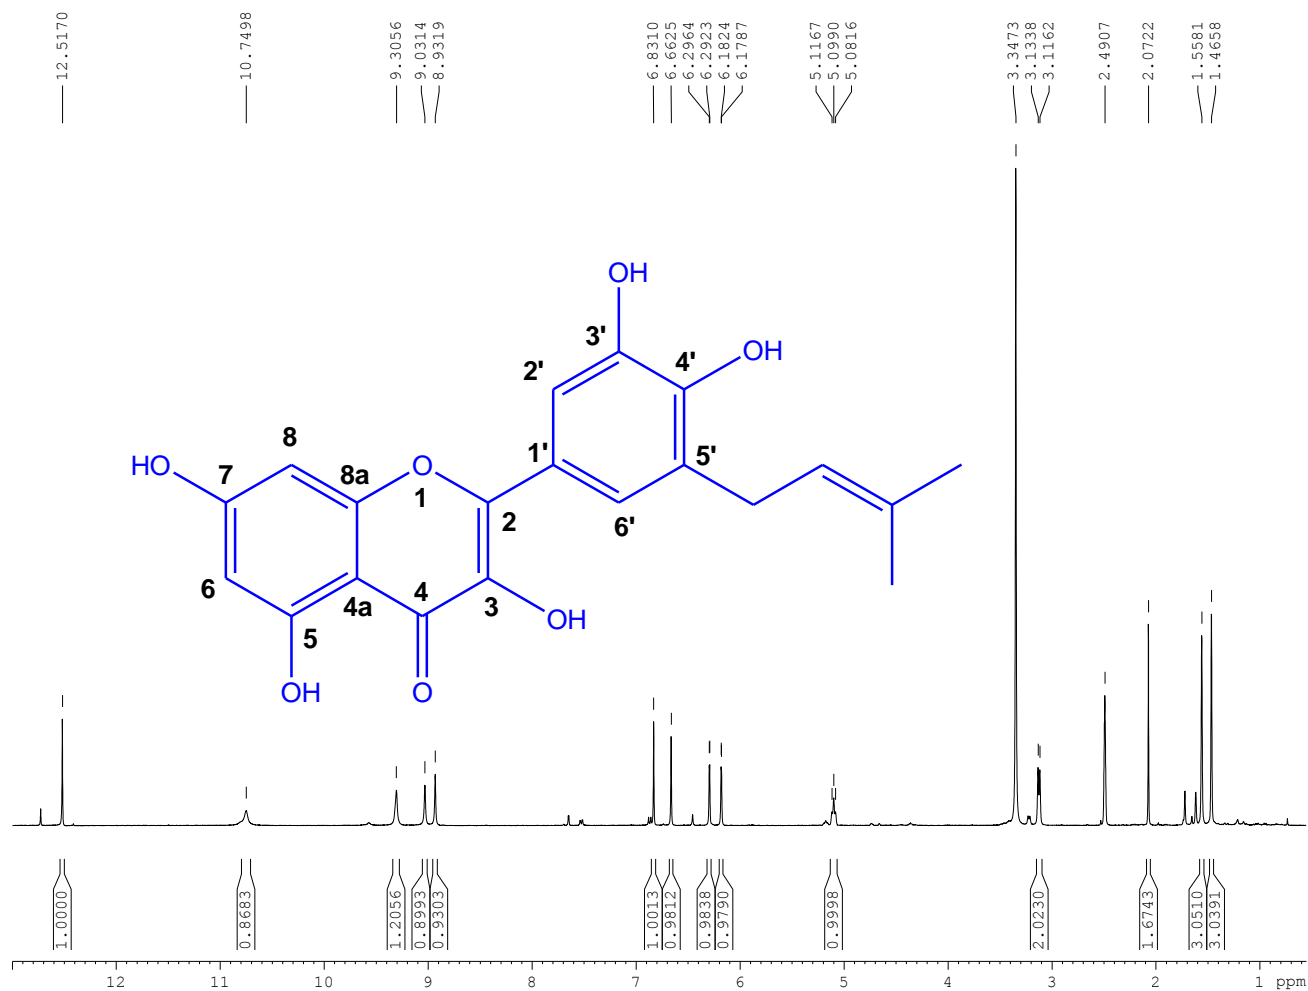

**Figure S5.**  $^1\text{H}$  NMR (400 MHz,  $\text{DMSO}-d_6$ ) spectrum of **9**.  $\delta$  ppm: 12.52 (s, 1H, ArOH-5); 10.75 (br s, 1H, ArOH-7); 9.03 (s, 1H, ArOH-3'); 9.03 (s, 1H, ArOH-4'); 8.93 (s, 1H, ArOH-3); 6.83 (s, 1H, ArH-2'); 6.66 (s, 1H, ArH-6'); 6.29 (d, 1H,  $J=1.6$  Hz, ArH-8); 6.18 (d, 1H,  $J=1.5$  Hz, ArH-6); 5.10 (br t, 1H,  $\text{CH}=\text{C}(\text{CH}_3)_2$ ); 3.12 (d, 2H,  $J=7.0$  Hz,  $\text{CH}_2\text{CH}=\text{C}(\text{CH}_3)_2$ ); 1.56 (s, 3H,  $\text{CH}_2\text{CH}=\text{CCH}_3\text{CH}_3$ ); 1.47 (s, 3H,  $\text{CH}_2\text{CH}=\text{CCH}_3\text{CH}_3$ ).

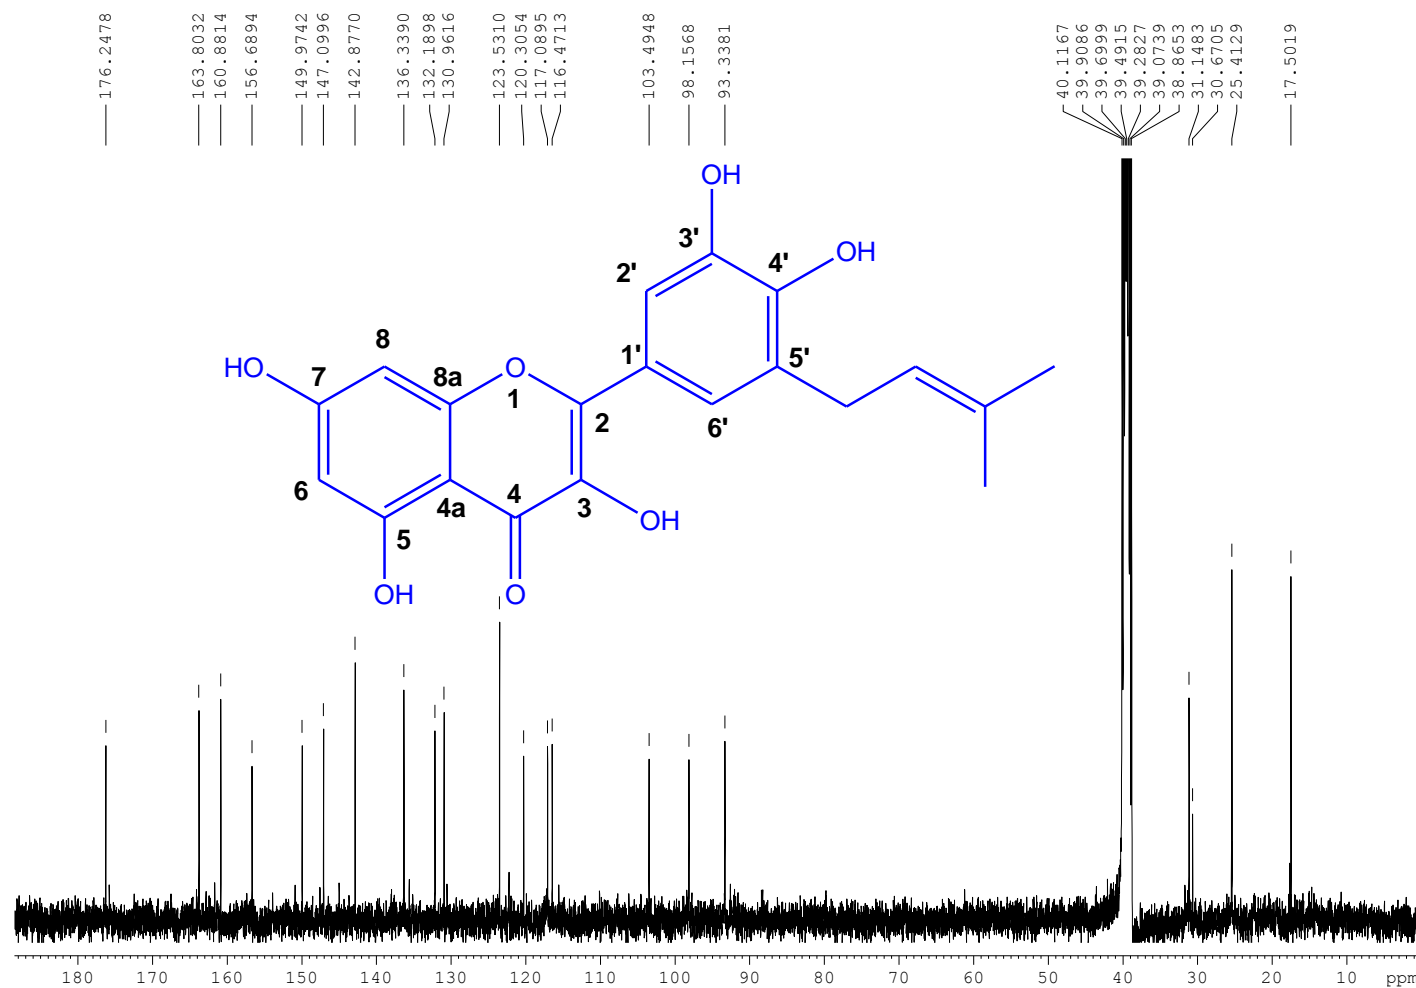

**Figure S6.** <sup>13</sup>C NMR (100 MHz, DMSO-*d*<sub>6</sub>) spectrum of 9. δ ppm: 17.5 (CH=CCH<sub>3</sub>CH<sub>3</sub>); 25.4 (CH<sub>2</sub>CH=CCH<sub>3</sub>CH<sub>3</sub>); 31.1 (CH<sub>2</sub>CH=CCH<sub>3</sub>CH<sub>3</sub>); 93.3 (ArC-8); 98.2 (ArC-6); 103.5 (ArC-4a); 116.5 (ArC-6'); 117.1 (ArC-2'); 120.3 (ArC-5'); 123.5 (CH=C(CH<sub>3</sub>)<sub>2</sub>); 131.0 (CH=C(CH<sub>3</sub>)<sub>2</sub>); 132.2 (ArC-3'); 136.3 (ArC-2); 142.9 (ArC-1'); 147.1 (ArC-4'); 150.0 (ArC-3); 156.7 (ArC-8a); 160.9 (ArC-5); 163.8 (ArC-7); 176.2 (4-C=O).

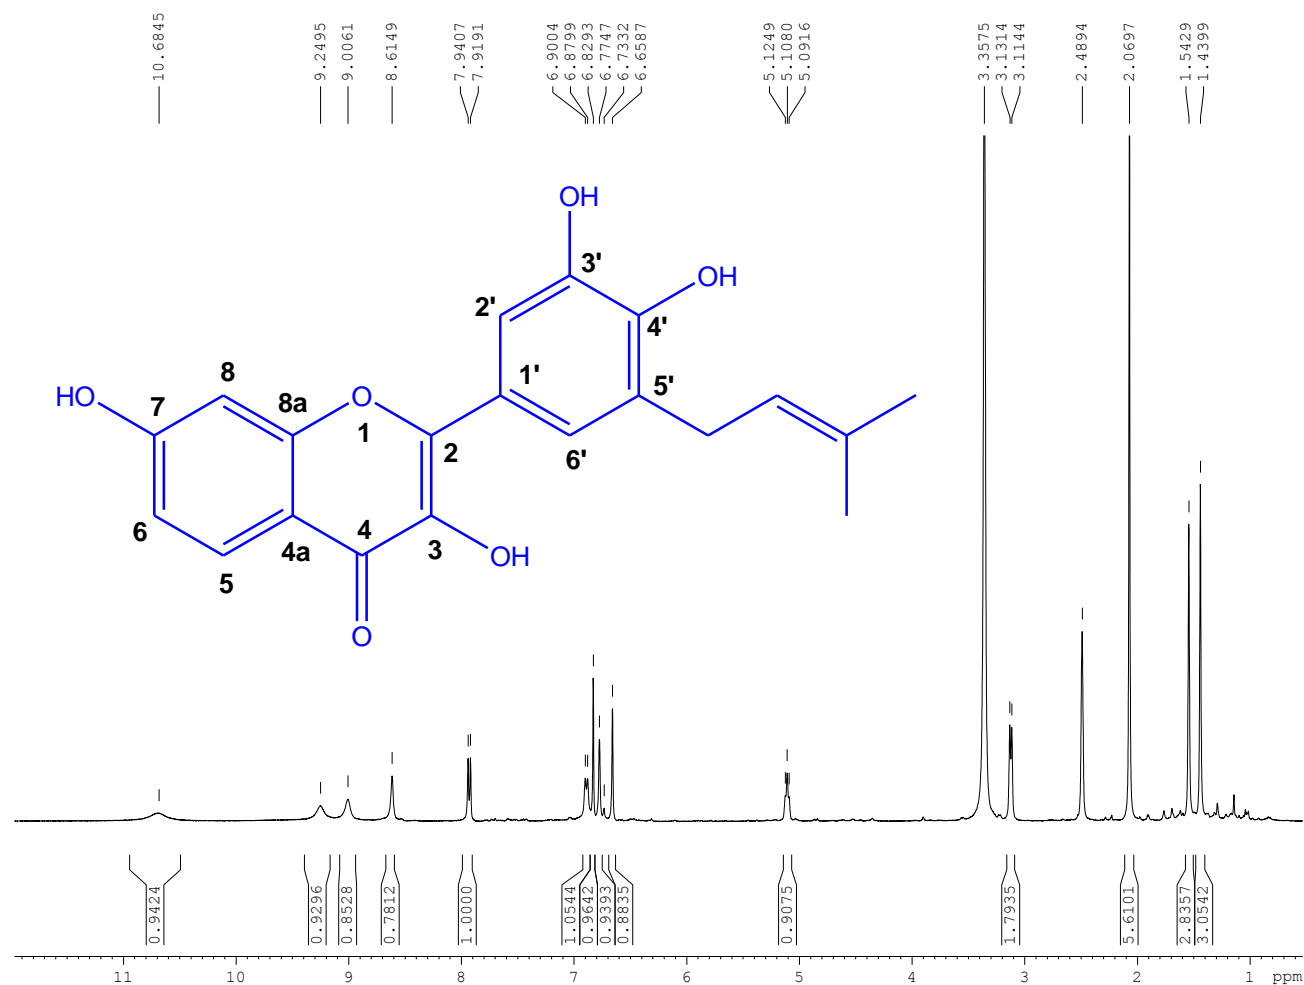

**Figure S7.**  $^1\text{H}$  NMR (400 MHz,  $\text{DMSO}-d_6$ ) spectrum of **10**.  $\delta$  ppm: 10.68 (br s, 1H, ArOH-7); 9.25 (s, 1H, ArOH-3'); 9.01 (s, 1H, ArOH-4'); 8.62 (s, 1H, ArOH-3); 7.93 (d, 1H,  $J = 8.6$  Hz, ArH-5); 6.89 (d, 1H,  $J = 8.2$  Hz, ArH-6); 6.83 (s, 1H, ArH-2'); 6.78 (s, 1H, ArH-8); 6.66 (s, 1H, ArH-6'); 5.11 (br t, 1H,  $\text{CH}=\text{C}(\text{CH}_3)_2$ ); 3.12 (d, 2H,  $J = 6.8$  Hz,  $\text{CH}_2\text{CH}=\text{C}(\text{CH}_3)_2$ ); 1.54 (s, 3H,  $\text{CH}_2\text{CH}=\text{CCH}_3\text{CH}_3$ ); 1.44 (s, 3H,  $\text{CH}_2\text{CH}=\text{CCH}_3\text{CH}_3$ ).



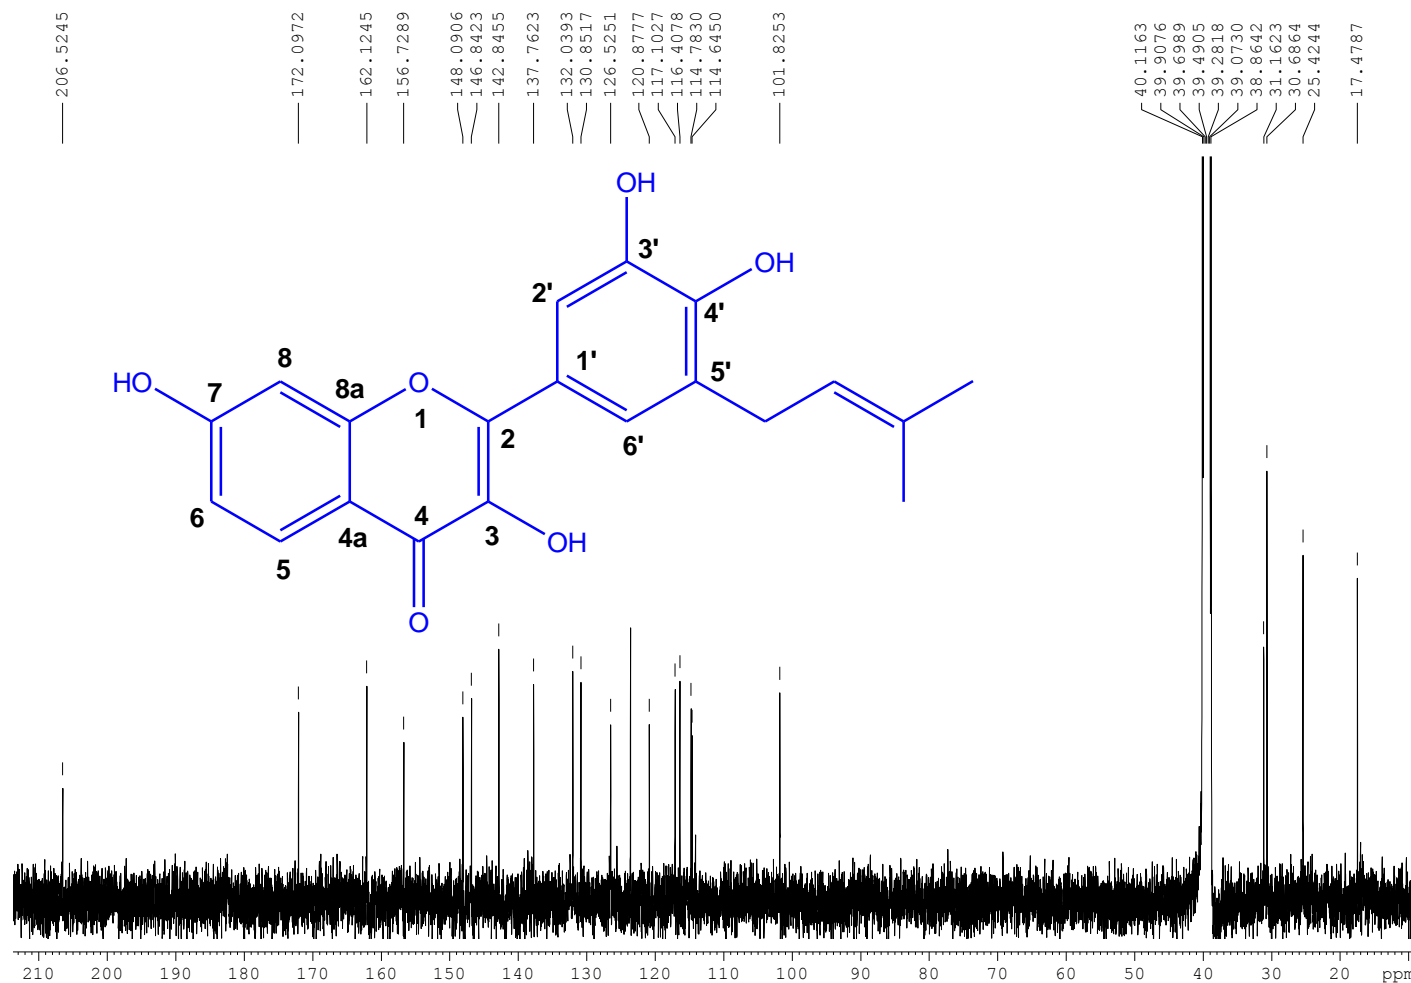

**Figure S8.**  $^{13}\text{C}$  NMR (100 MHz,  $\text{DMSO}-d_6$ ) spectrum of **10**.  $\delta$  ppm: 17.5 ( $\text{CH}=\text{CCH}_3\text{CH}_3$ ); 25.4 ( $\text{CH}_2\text{CH}=\text{CCH}_3\text{CH}_3$ ); 31.2 ( $\text{CH}_2\text{CH}=\text{CCH}_3\text{CH}_3$ ); 101.8 (ArC-8); 114.6 (ArC-6); 114.8 (ArC-4a); 116.4 (ArC-6'); 117.1 (ArC-2'); 120.9 (ArC-5'); 123.6 ( $\text{CH}=\text{C}(\text{CH}_3)_2$ ); 126.5 (ArC-5); 130.8 ( $\text{CH}=\text{C}(\text{CH}_3)_2$ ); 132.0 (ArC-3'); 137.8 (ArC-1'); 142.8 (ArC-2); 146.8 (ArC-4'); 148.1 (ArC-3); 156.7 (ArC-8a); 162.1 (ArC-7); 172.1 (4-C=O).

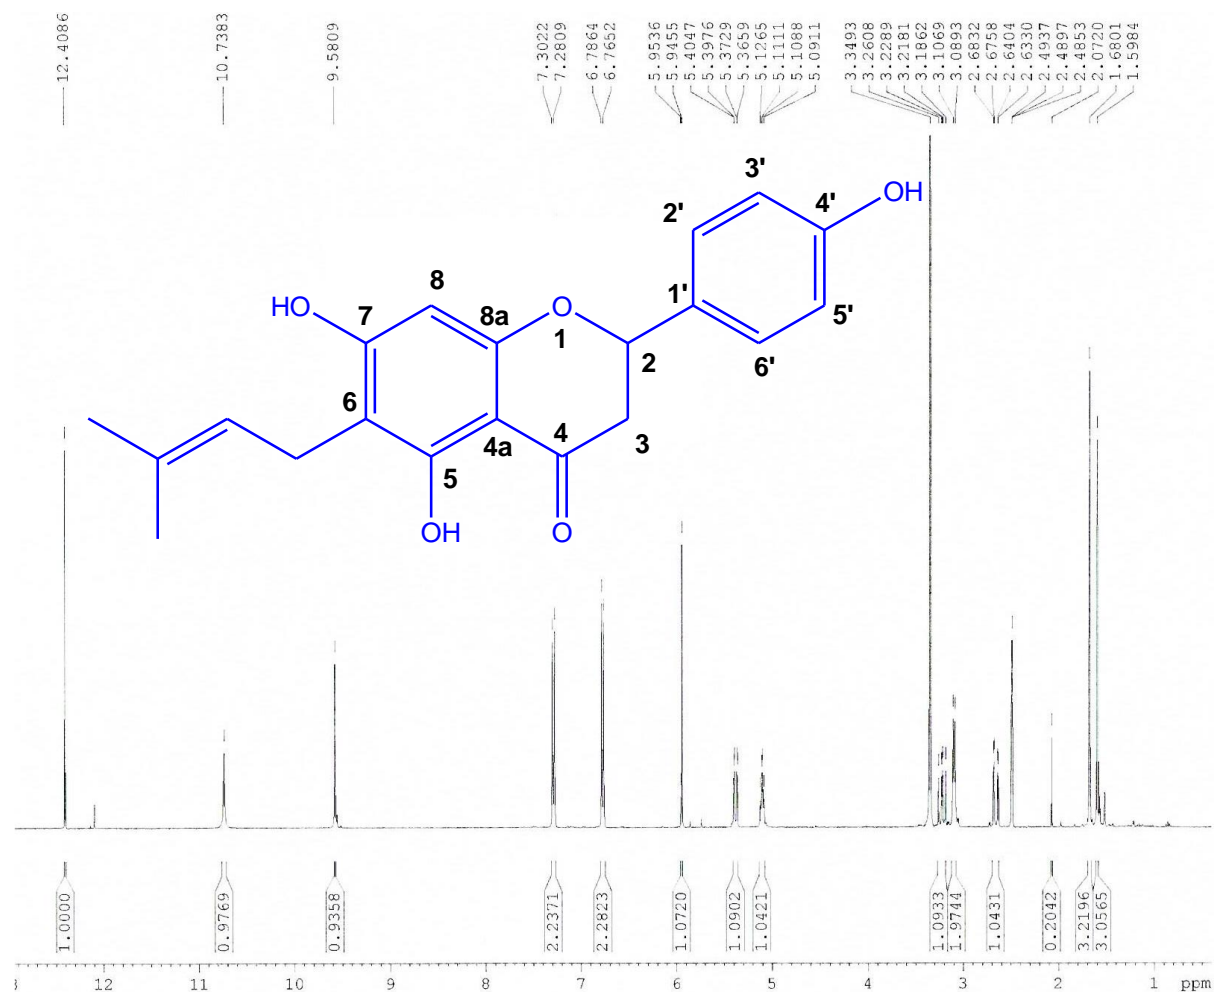

**Figure S9.**  $^1\text{H}$  NMR (400 MHz,  $\text{DMSO}-d_6$ ) spectrum of **11**.  $\delta$  ppm: 12.40 (s, 1H, Ar-OH-5); 10.74 (br s, 1H, ArOH-7); 9.55 (br s, 1H, ArOH-4'); 7.29 (d, 2H,  $J = 8.4$  Hz, ArH-2',6'); 6.78 (d,  $J = 8.4$  Hz, 2H, ArH-3',5'); 5.94 (s, 1H, ArH-8); 5.94 (dd, 1H,  $J_1 = 12.5$  Hz,  $J_2 = 2.6$  Hz, CH-2); 5.11 (br t, 1H,  $\text{CH}=\text{C}(\text{CH}_3)_2$ ); 3.22 (dd, 1H,  $J_1 = 17.1$  Hz,  $J_2 = 12.7$  Hz, CHH-3); 3.10 (d, 2H,  $J = 7.0$  Hz,  $\text{CH}_2\text{CH}=\text{C}(\text{CH}_3)_2$ ); 2.66 (dd, 1H,  $J_1 = 14.3$  Hz,  $J_2 = 2.9$  Hz, CHH-3); 1.68 (s, 3H,  $\text{CH}_2\text{CH}=\text{C}(\text{CH}_3)_2$ ); 1.60 (s, 3H,  $\text{CH}_2\text{CH}=\text{C}(\text{CH}_3)_2$ ).

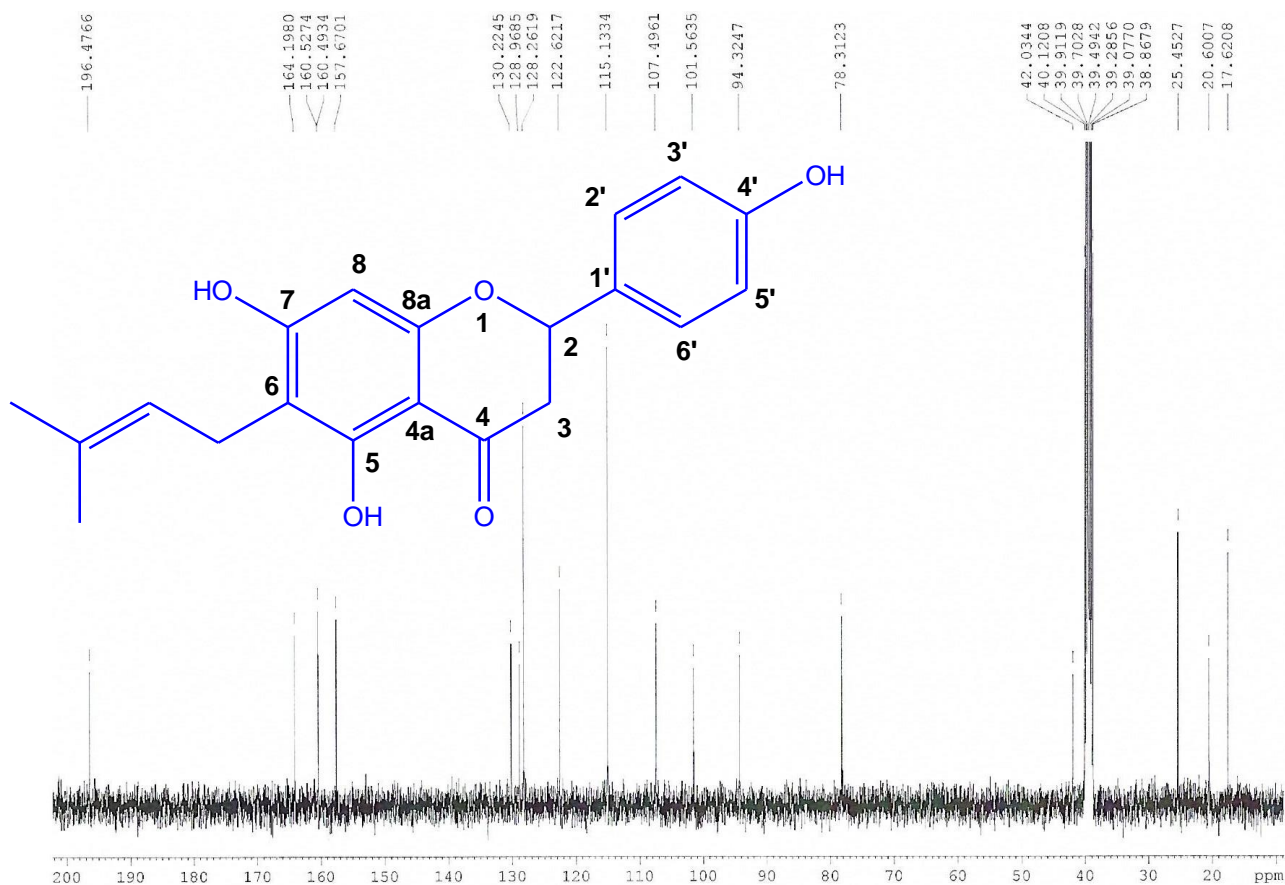

**Figure S10.**  $^{13}\text{C}$  NMR (100 MHz,  $\text{DMSO}-d_6$ ) spectrum of **11**.  $\delta$  ppm: 17.6 ( $-\text{CH}=\text{CCH}_3\text{CH}_3$ ); 20.6 ( $-\text{CH}_2\text{CH}=\text{CCH}_3\text{CH}_3$ ); 25.4 ( $-\text{CH}_2\text{CH}=\text{CCH}_3\text{CH}_3$ ); 42.0 ( $\text{CH}_2$ -3); 78.3 (ArC-2); 94.3 (ArC-8); 101.5 (ArC-4a); 107.5 (ArC-6); 115.1 (ArC-3',5'); 122.6 ( $\text{CH}=\text{C}(\text{CH}_3)_2$ ); 128.3 (ArC-2',6'); 128.98 (ArC-1'); 130.2 ( $\text{CH}=\text{C}(\text{CH}_3)_2$ ); 157.7 (ArC-4'); 160.5 (ArC-7,8a); 164.3 (ArC-5); 196.4 (4-C=O).

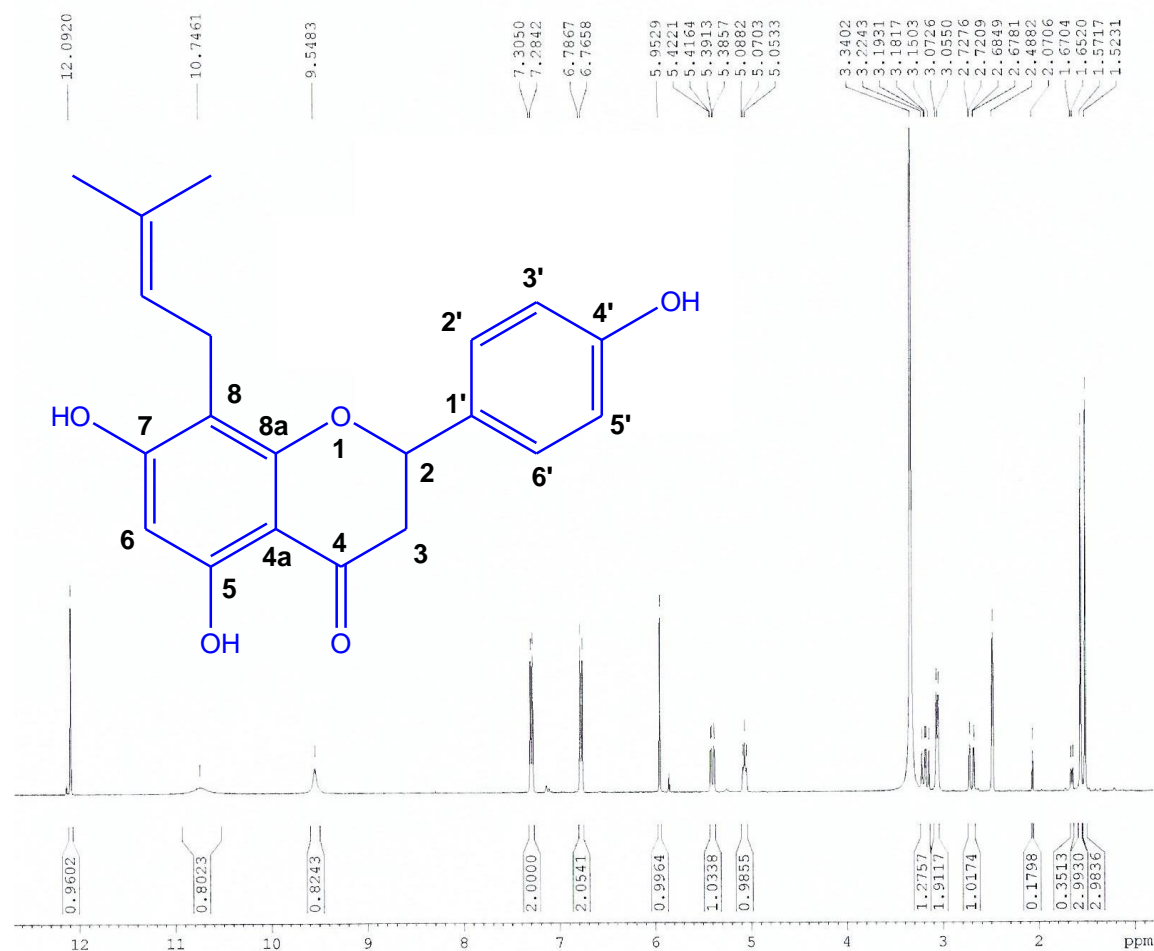

**Figure S11.**  $^1\text{H}$  NMR (100 MHz,  $\text{DMSO}-d_6$ ) spectrum of **12**.  $\delta$  ppm: 12.09 (s, 1H, Ar-OH-5); 10.75 (s, 1H, ArOH-7); 9.56 (s, 1H, ArOH-4') 7.30 (d, 2H,  $J = 8.4$  Hz, ArH-2',6'); 6.78 (d,  $J = 8.4$  Hz, 2H, ArH-3',5'); 5.95 (s, 1H, ArH-6); 5.40 (dd, 1H,  $J_1 = 12.4$  Hz,  $J_2 = 2.7$  Hz, CH-2); 5.07 (br. t, 1H, CH=C(CH<sub>3</sub>)<sub>2</sub>); 3.19 (dd, 1H,  $J_1 = 17.1$  Hz,  $J_2 = 12.6$  Hz, CHH-3); 3.06 (d, 2H,  $J = 7.1$  Hz, CH<sub>2</sub>CH=C(CH<sub>3</sub>)<sub>2</sub>); 2.70 (dd, 1H,  $J_1 = 17.2$  Hz,  $J_2 = 2.7$  Hz, CHH-3); 1.57 (s, 3H, CH<sub>2</sub>CH=CCH<sub>3</sub>CH<sub>3</sub>); 1.52 (s, 3H, CH<sub>2</sub>CH=CCH<sub>3</sub>CH<sub>3</sub>).

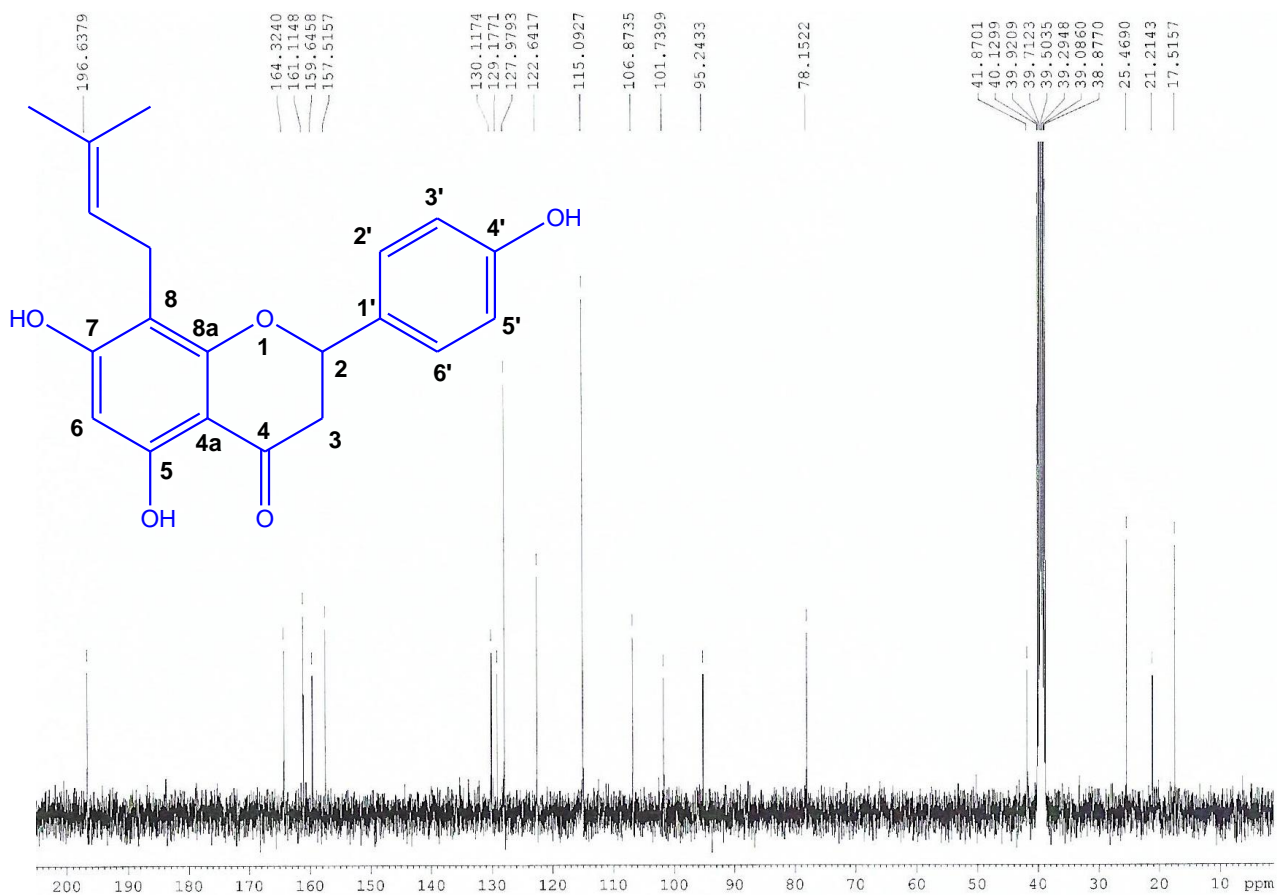

**Figure S12.**  $^{13}\text{C}$  NMR (100 MHz,  $\text{DMSO-}d_6$ ) spectrum of **12**.  $\delta$  ppm: 17.6 ( $-\text{CH}=\text{CCH}_3\text{CH}_3$ ); 21.2 ( $-\text{CH}_2\text{CH}=\text{CCH}_3\text{CH}_3$ ); 25.5 ( $-\text{CH}_2\text{CH}=\text{CCH}_3\text{CH}_3$ ); 41.9 ( $\text{CH}_2$ -3); 78.2 (ArC-2); 95.3 (ArC-6); 101.7 (ArC-4a); 106.9 (ArC-8); 115.1 (ArC-3',5'); 122.6 ( $\text{CH}=\text{C}(\text{CH}_3)_2$ ); 128.0 (ArC-2',6'); 129.2 (ArC-1'); 130.1 ( $\text{CH}=\text{C}(\text{CH}_3)_2$ ); 157.5 (ArC-4'); 159.7 (ArC-8a); 161.1 (ArC-5); 164.3 (ArC-7); 196.6 (4-C=O).

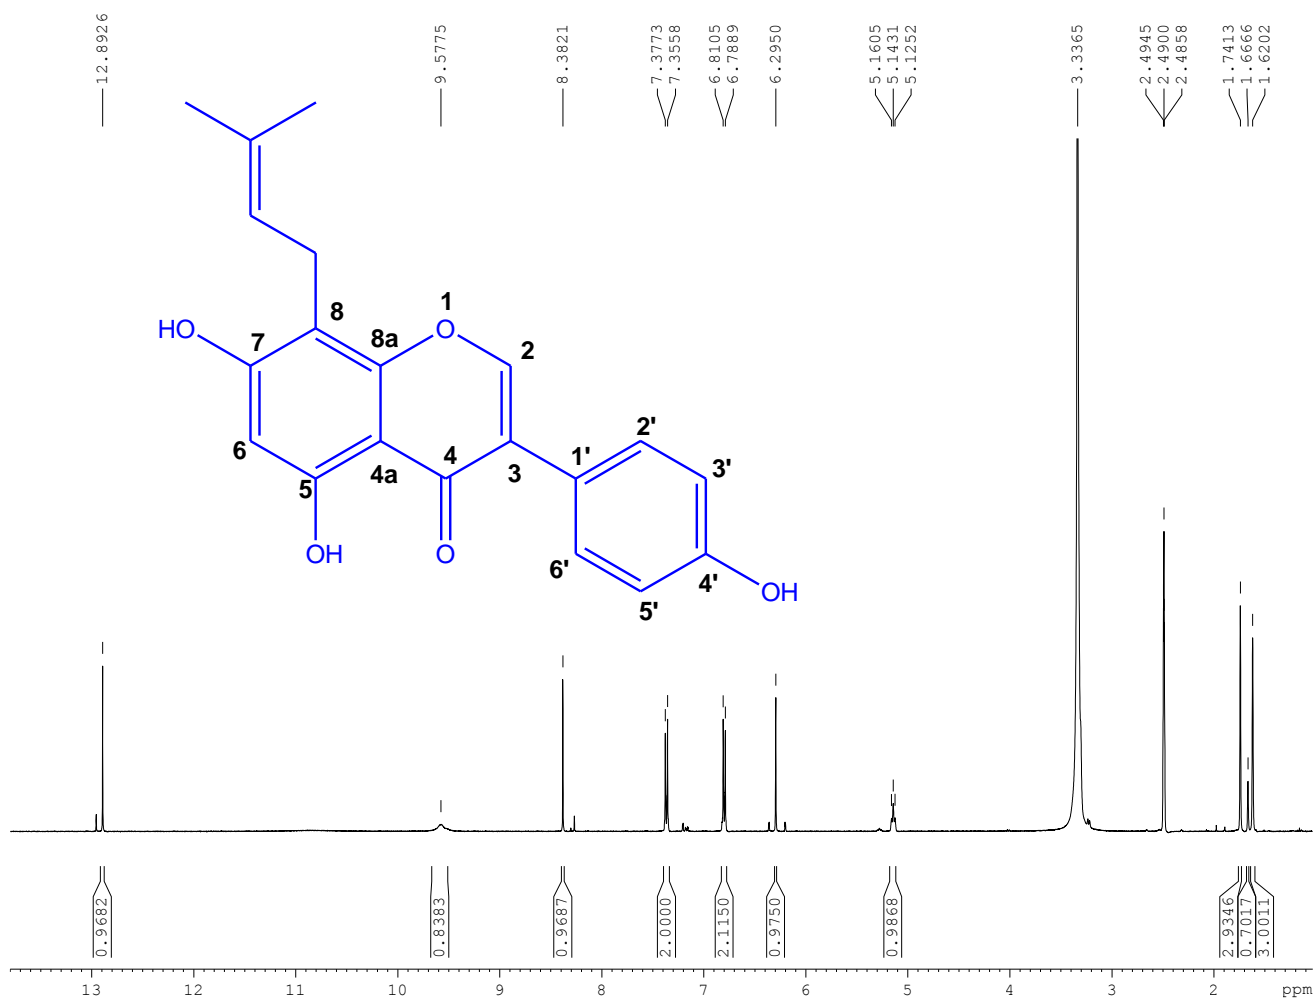

**Figure S13.** <sup>1</sup>H NMR (400 MHz, DMSO-*d*<sub>6</sub>) spectrum of **13**.  $\delta$  ppm: 12.98 (s, 1H, ArOH-5); 9.58 (br s, 1H, ArOH-4'); 8.38 (s, 1H, ArH-2); 7.37 (d, 2H,  $J = 8.6$  Hz, ArH-2',6'); 6.80 (d, 2H,  $J = 8.6$  Hz, ArH-3',5'); 6.30 (s, 1H, ArH-6); 5.14 (br t, 1H,  $\text{CH}=\text{C}(\text{CH}_3)_2$ ); 3.34 (overload with H<sub>2</sub>O,  $\text{CH}_2\text{CH}=\text{C}(\text{CH}_3)_2$ ); 1.74 (s, 3H,  $-\text{CH}_2\text{CH}=\text{CCH}_3\text{CH}_3$ ); 1.62 (s, 3H,  $-\text{CH}_2\text{CH}=\text{CCH}_3\text{CH}_3$ ).

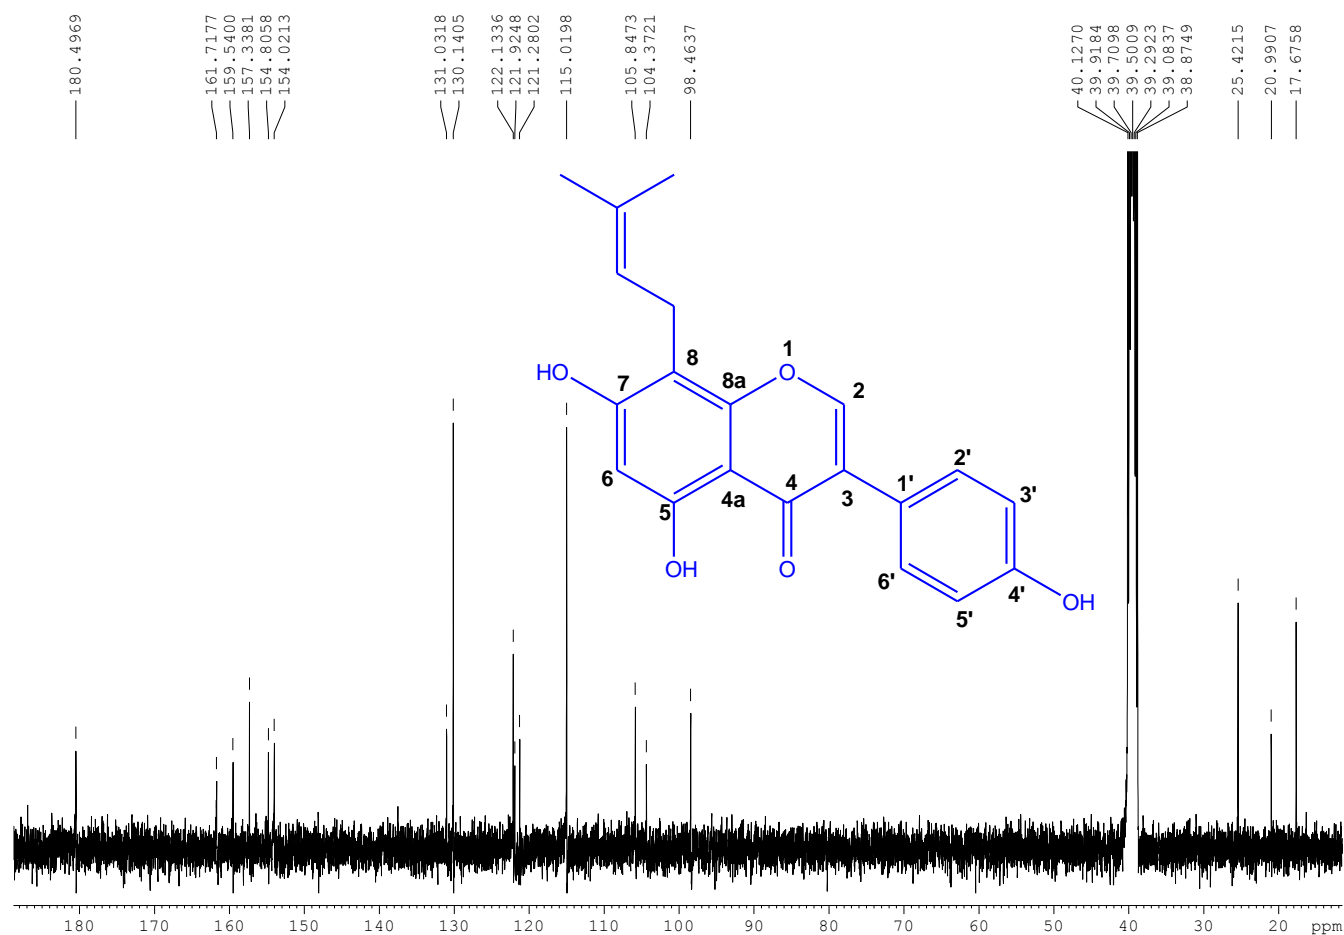

**Figure S14.** <sup>13</sup>C NMR (100 MHz, DMSO-*d*<sub>6</sub>) spectrum of **13**.  $\delta$  ppm: 17.7 (-CH=CCH<sub>3</sub>CH<sub>3</sub>); 21.0 (-CH<sub>2</sub>CH=CCH<sub>3</sub>CH<sub>3</sub>); 25.4 (CH<sub>2</sub>CH=CCH<sub>3</sub>CH<sub>3</sub>); 98.5 (ArC-6); 104.4 (ArC-4a); 105.8 (ArC-8); 115.0 (ArC-3',5'); 121.3 (ArC-1'); 121.9 (ArC-3); 122.1 (CH=C(CH<sub>3</sub>)<sub>2</sub>); 130.1 (ArC-2',6'); 131.0 (CH=C(CH<sub>3</sub>)<sub>2</sub>); 154.0 (ArC-2); 154.8 (ArC-8a); 157.3 (ArC-4'); 159.5 (ArC-5); 161.7 (ArC-7); 180.5 (4-C=O).

## 2D NMR spectra

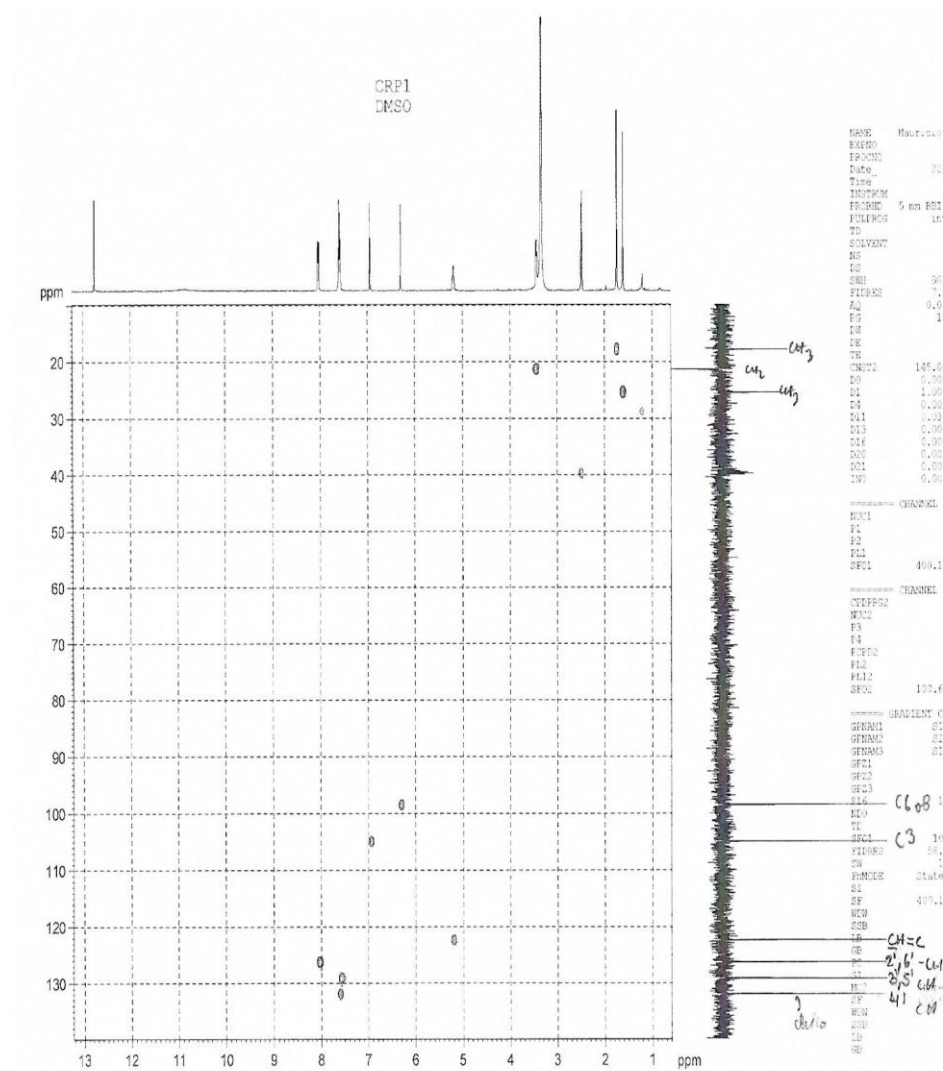

Figure S15. 2D HSQC of 7.



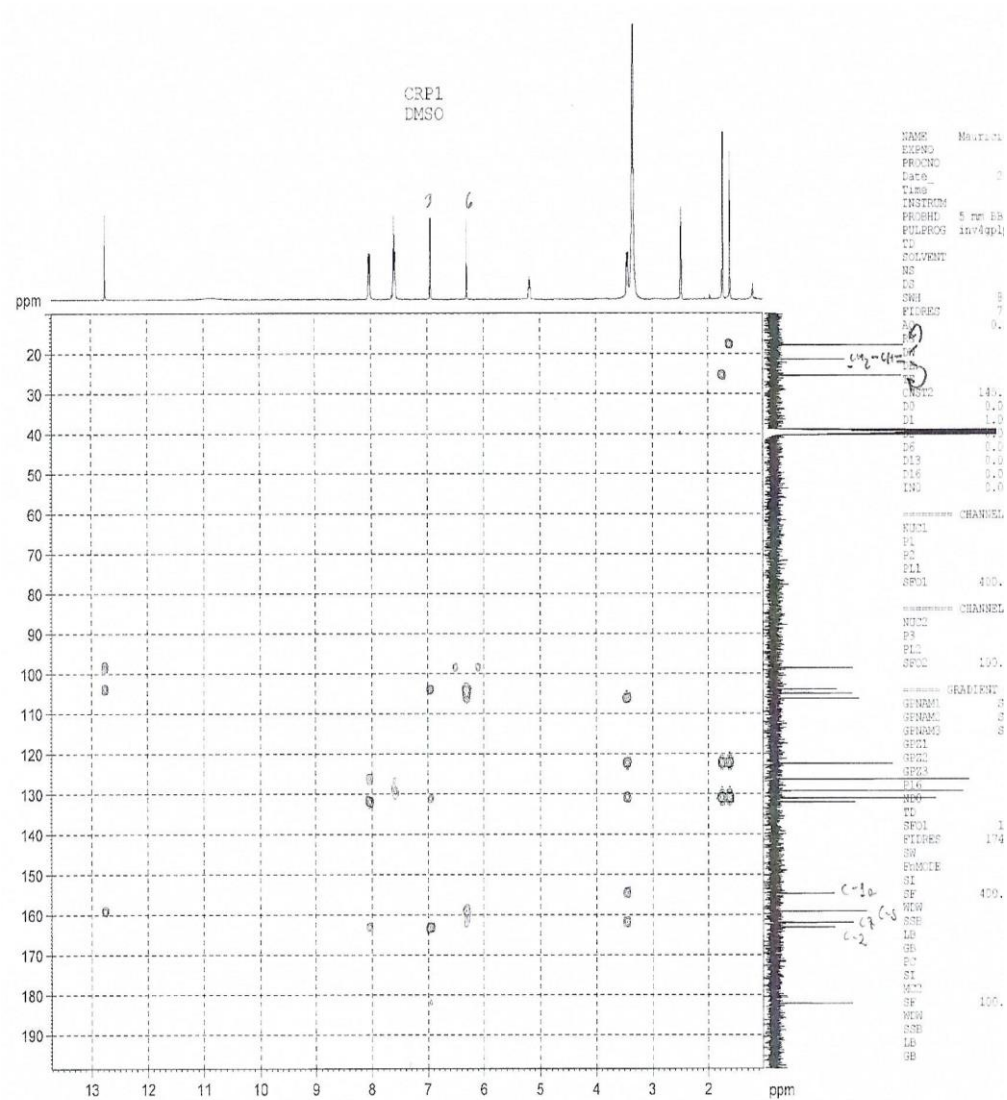

Figure S16. 2D HMBC of 7.





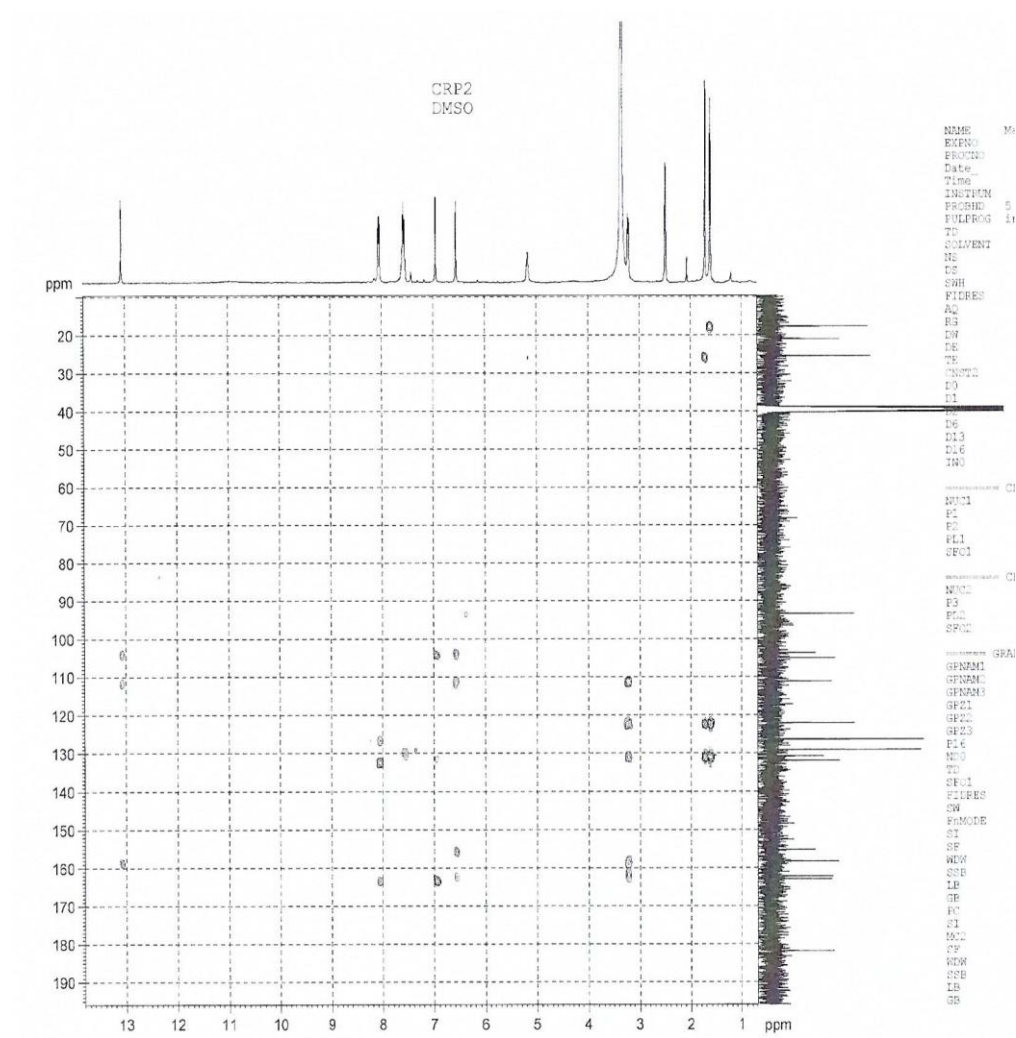

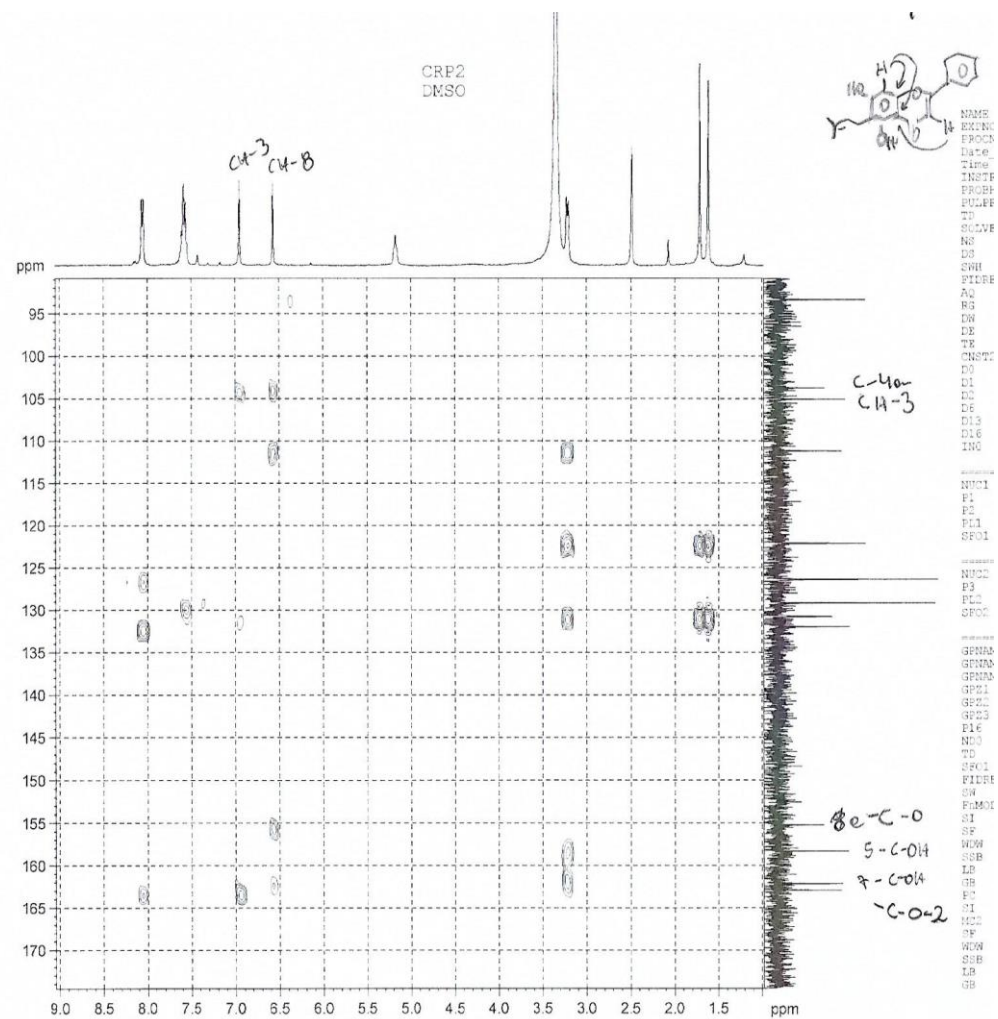

Figure S20. Zoom of 2D HMBC of 8.





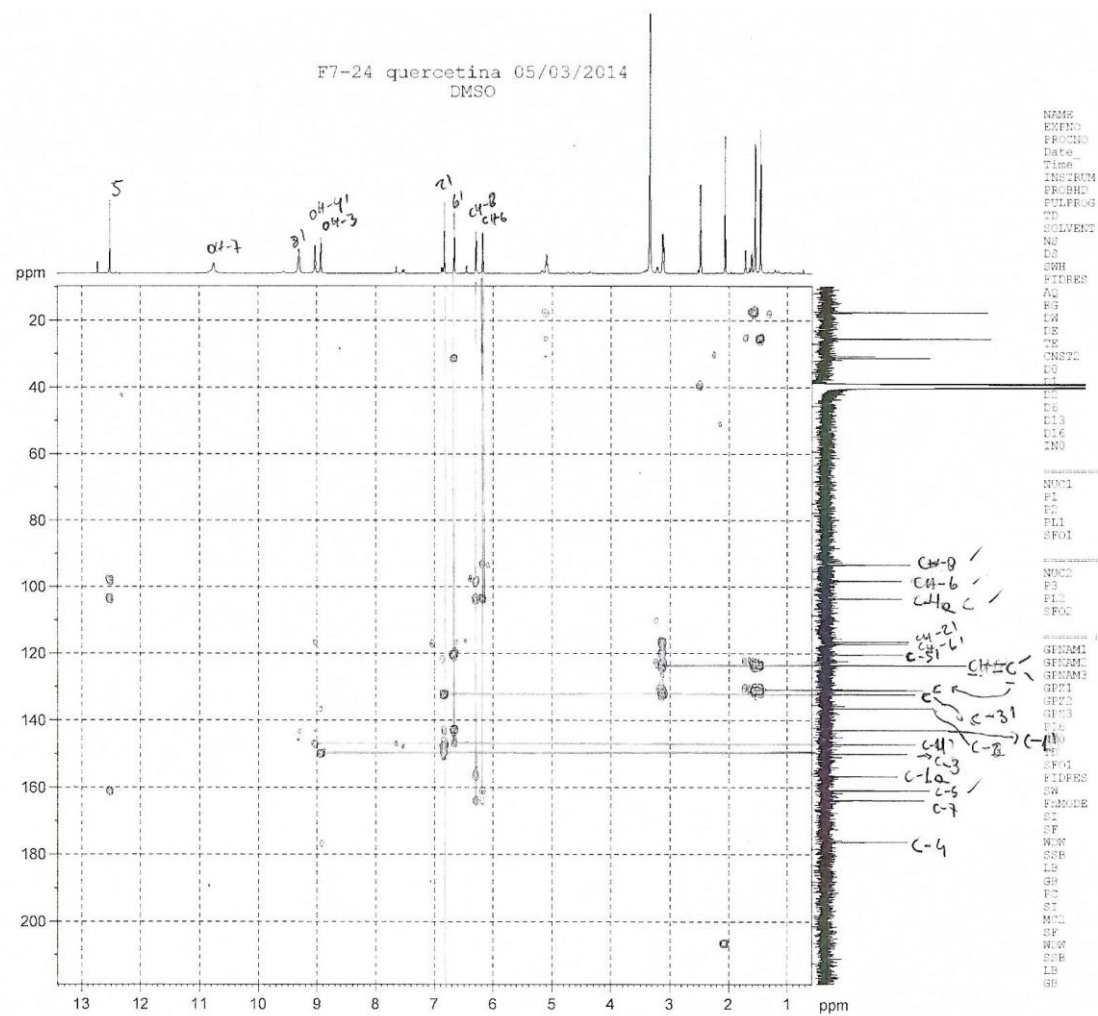

Figure S22. 2D HMBC of 9.

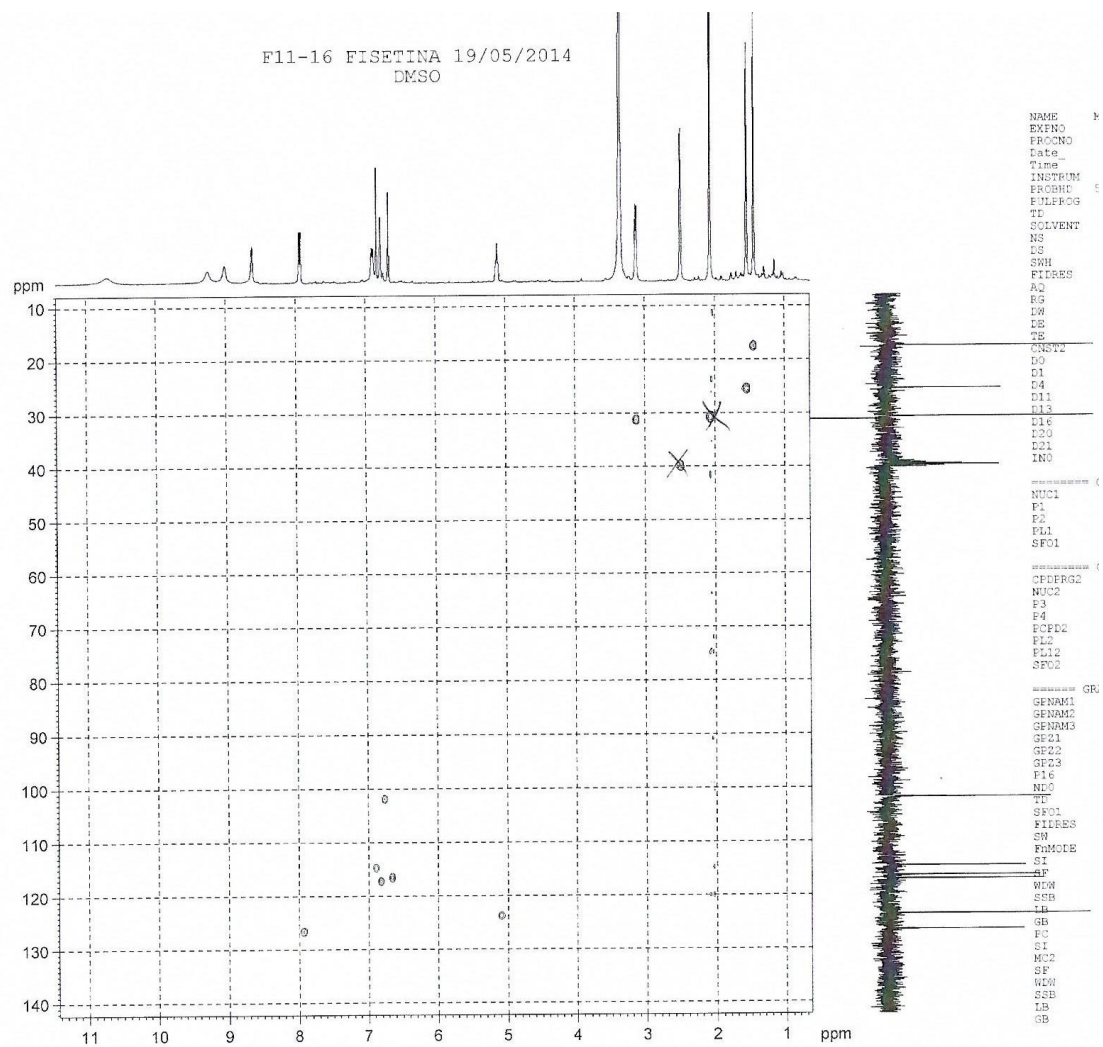

Figure S23. 2D HSQC of 10.



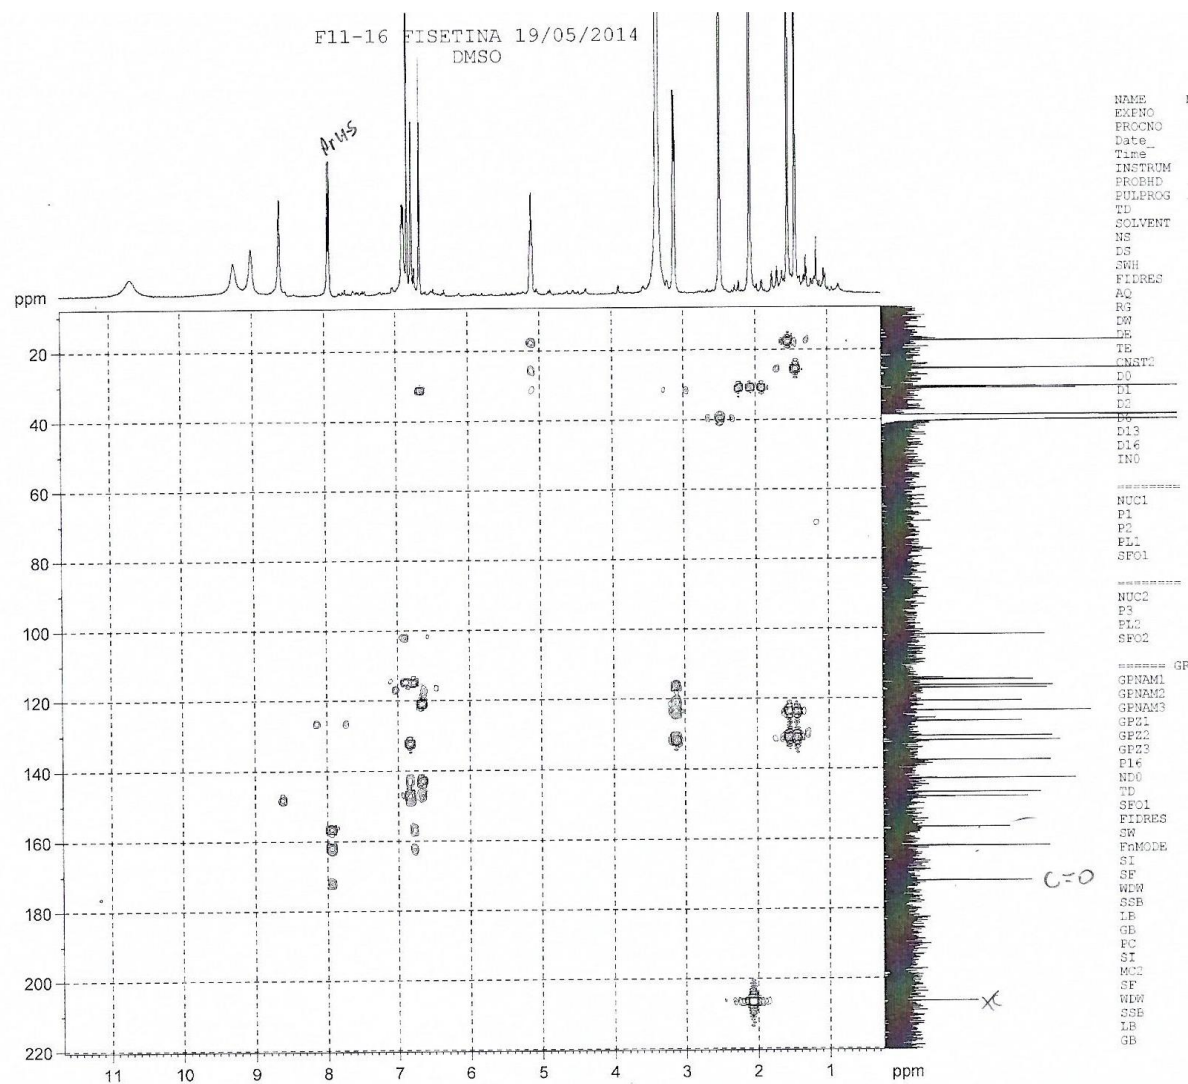

Figure S24. 2D HMBC of 10.



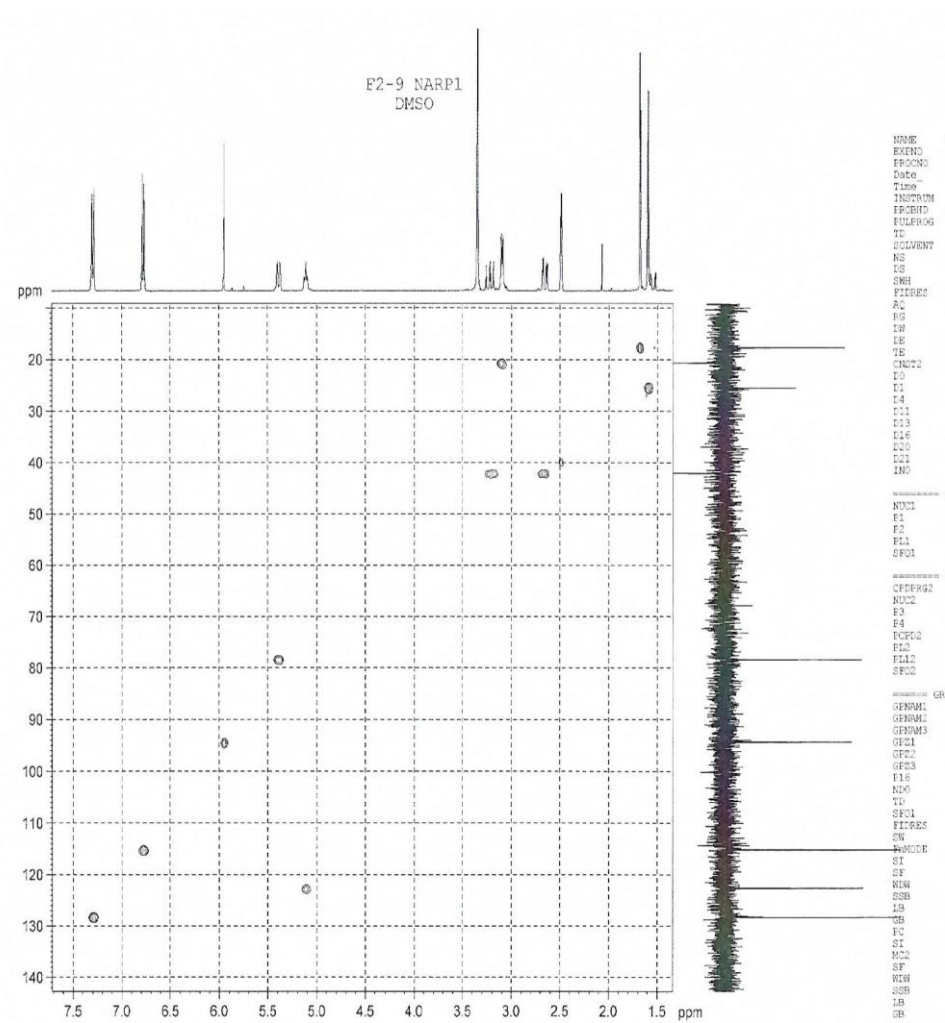

Figure S26. 2D HSQC of 11.

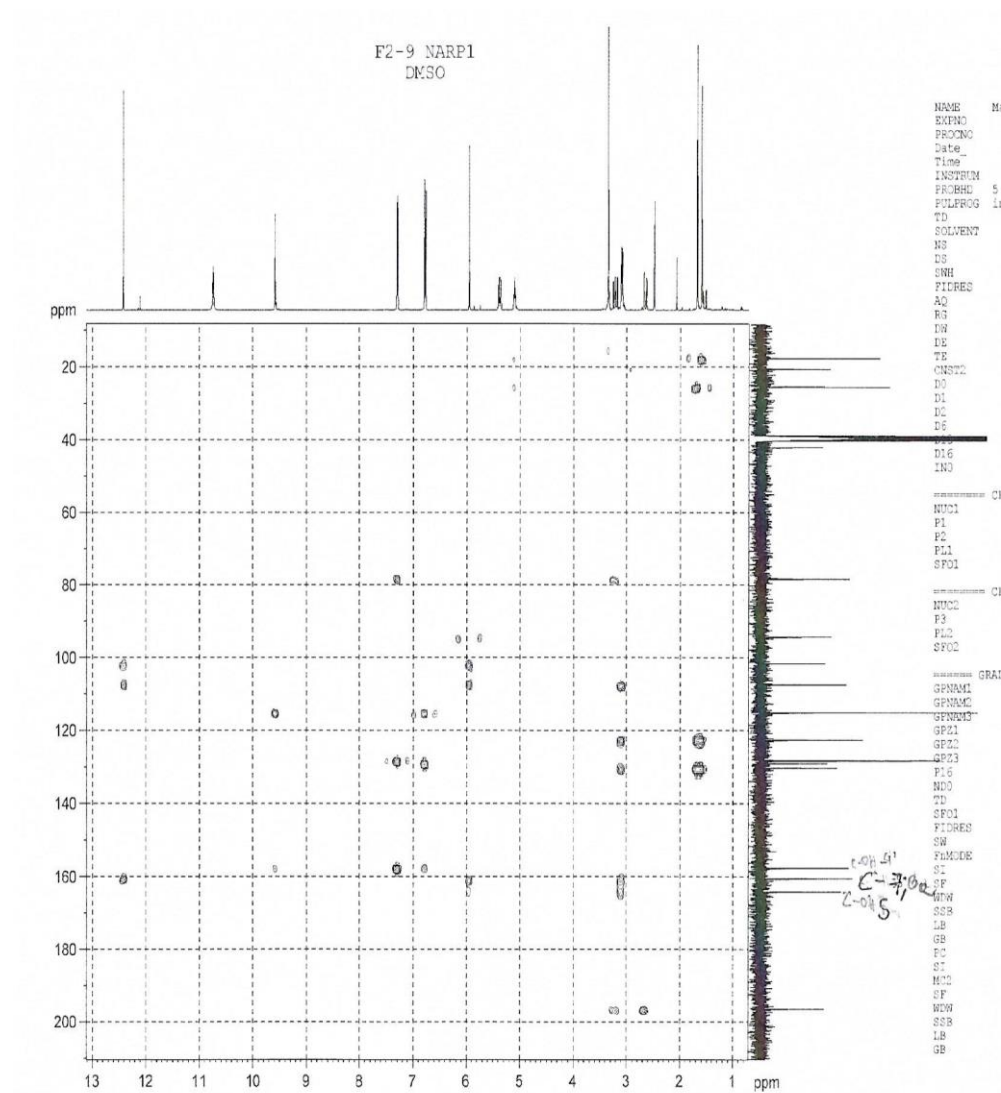

Figure S27. 2D HMBC of 11.



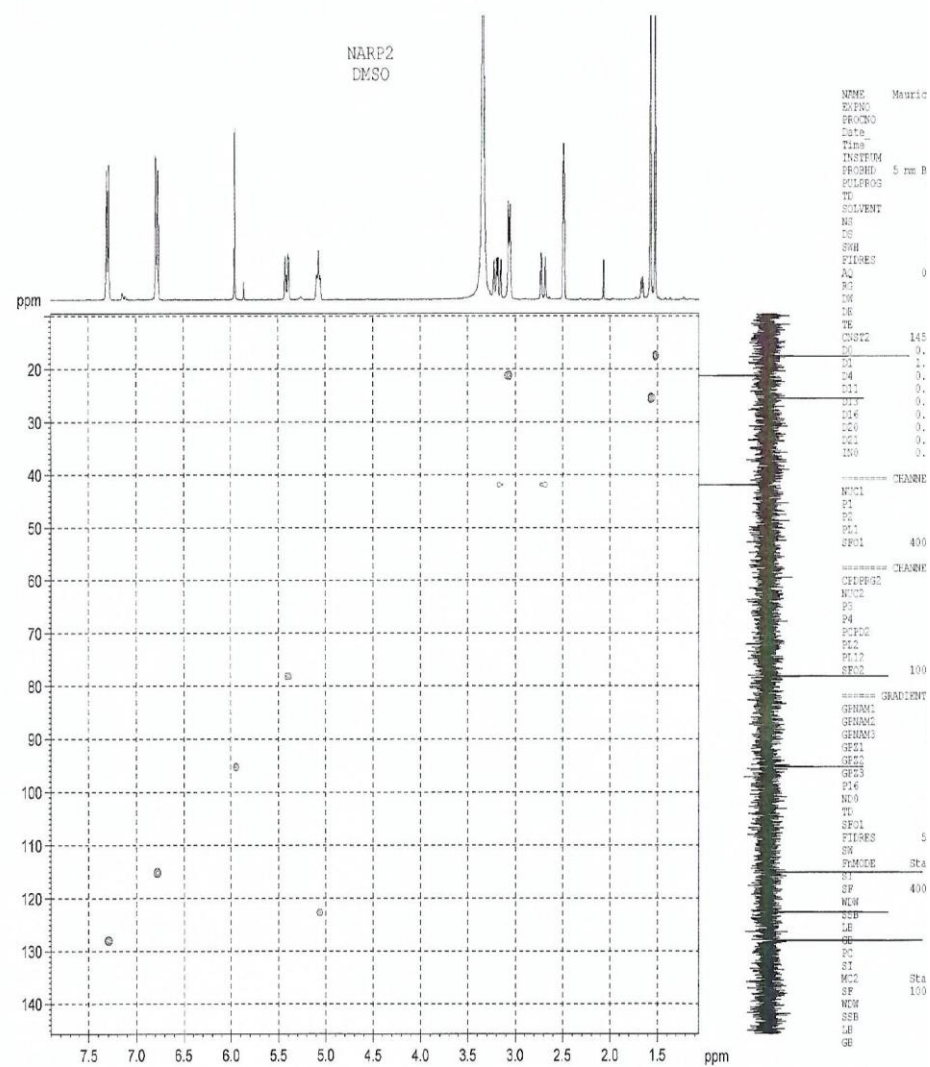

Figure S29. 2D HSQC of 12.





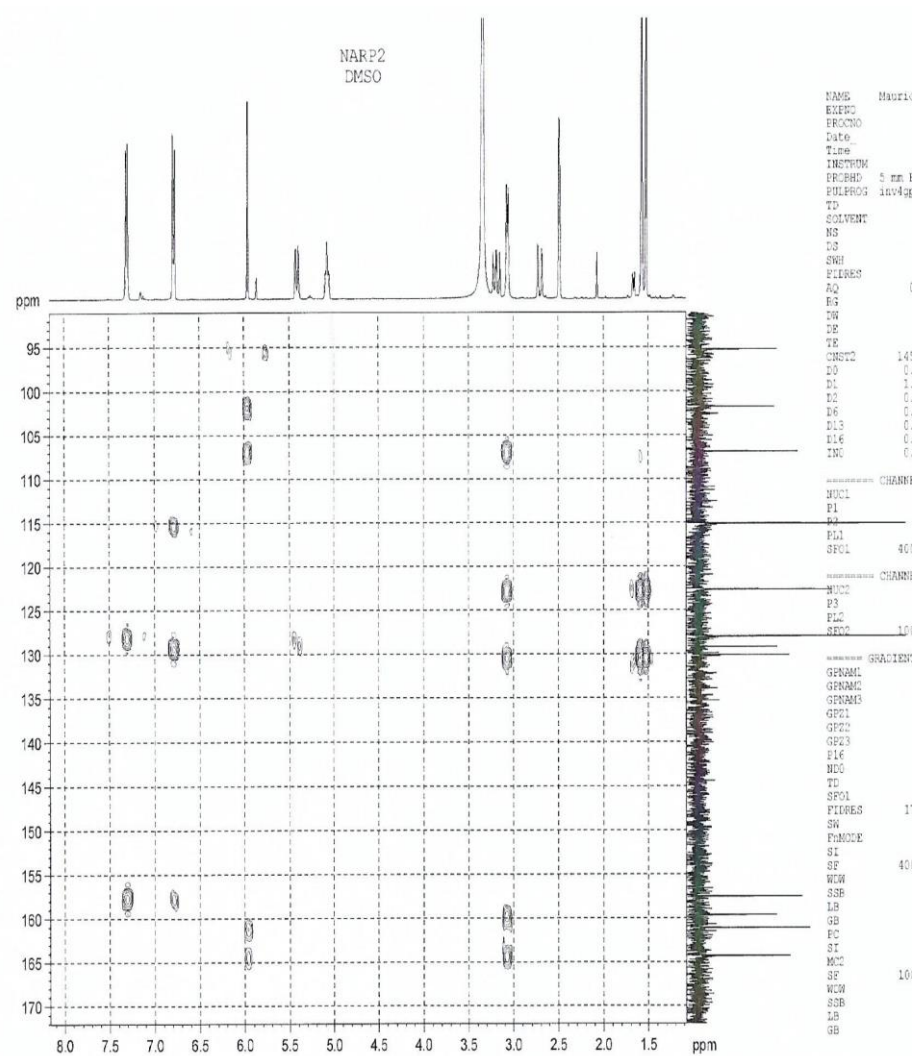

**Figure S31.** Zoom of 2D HMBC of 12.



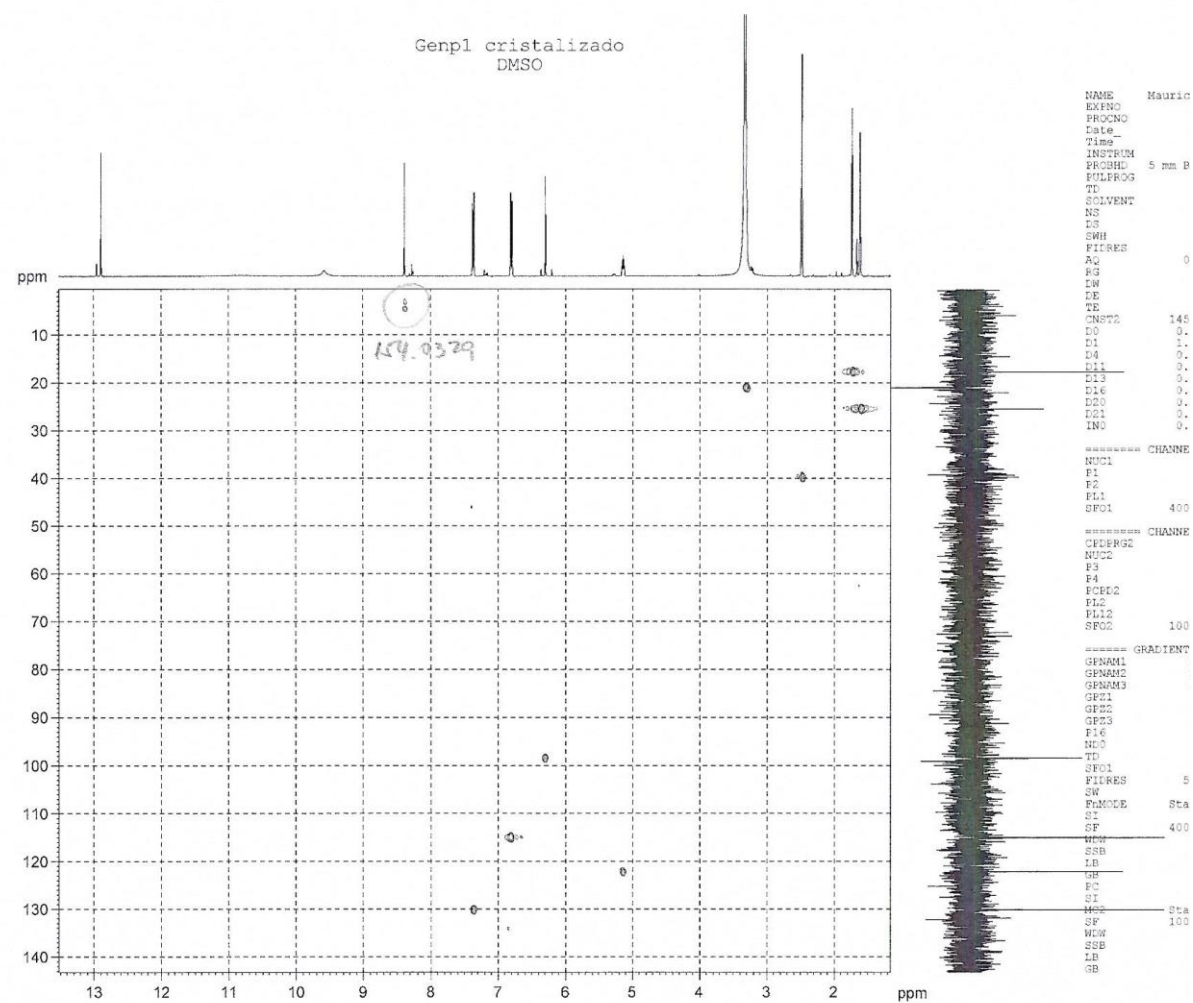

Figure S32. 2D HSQC of 13.

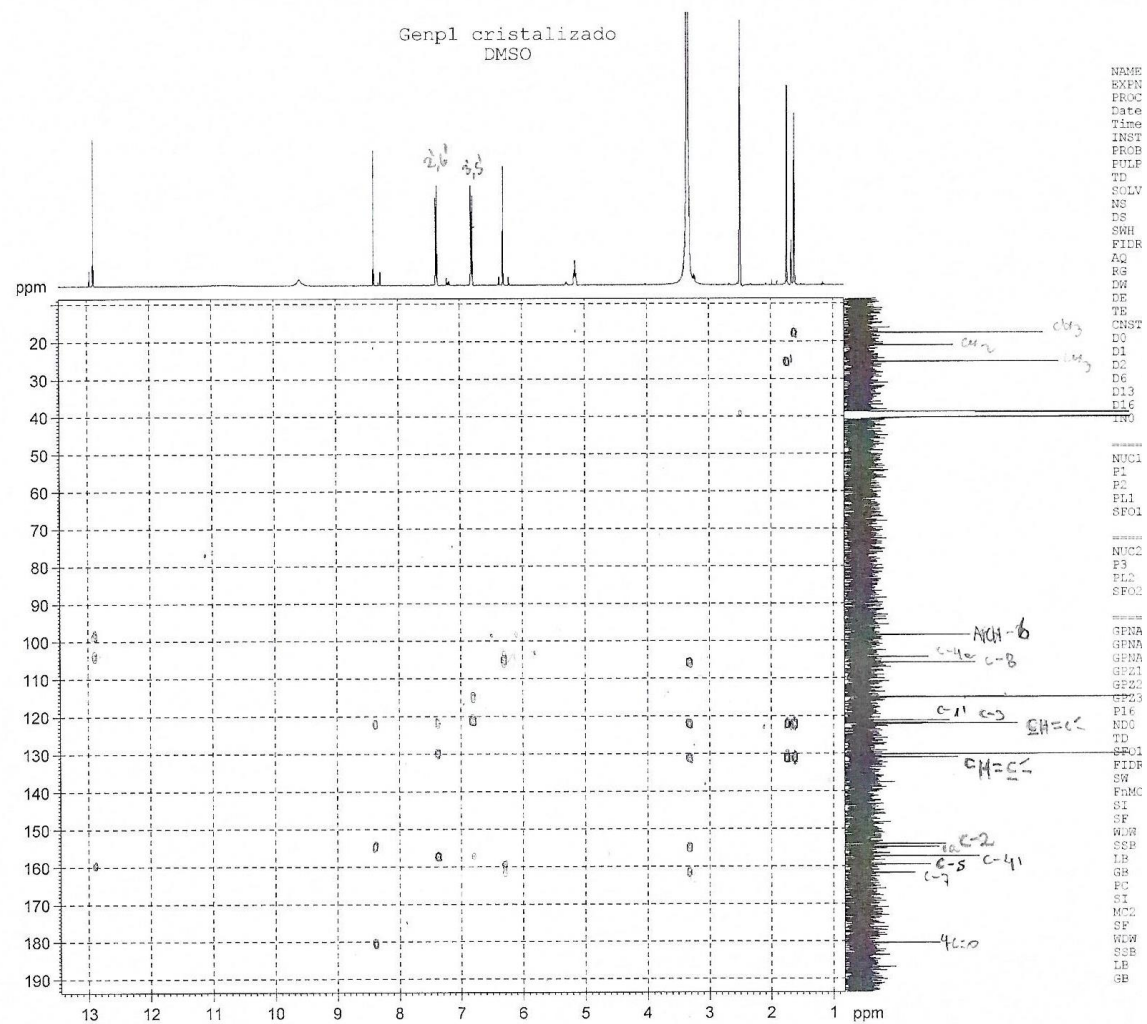

Figure S33. 2D HMBC of 13.

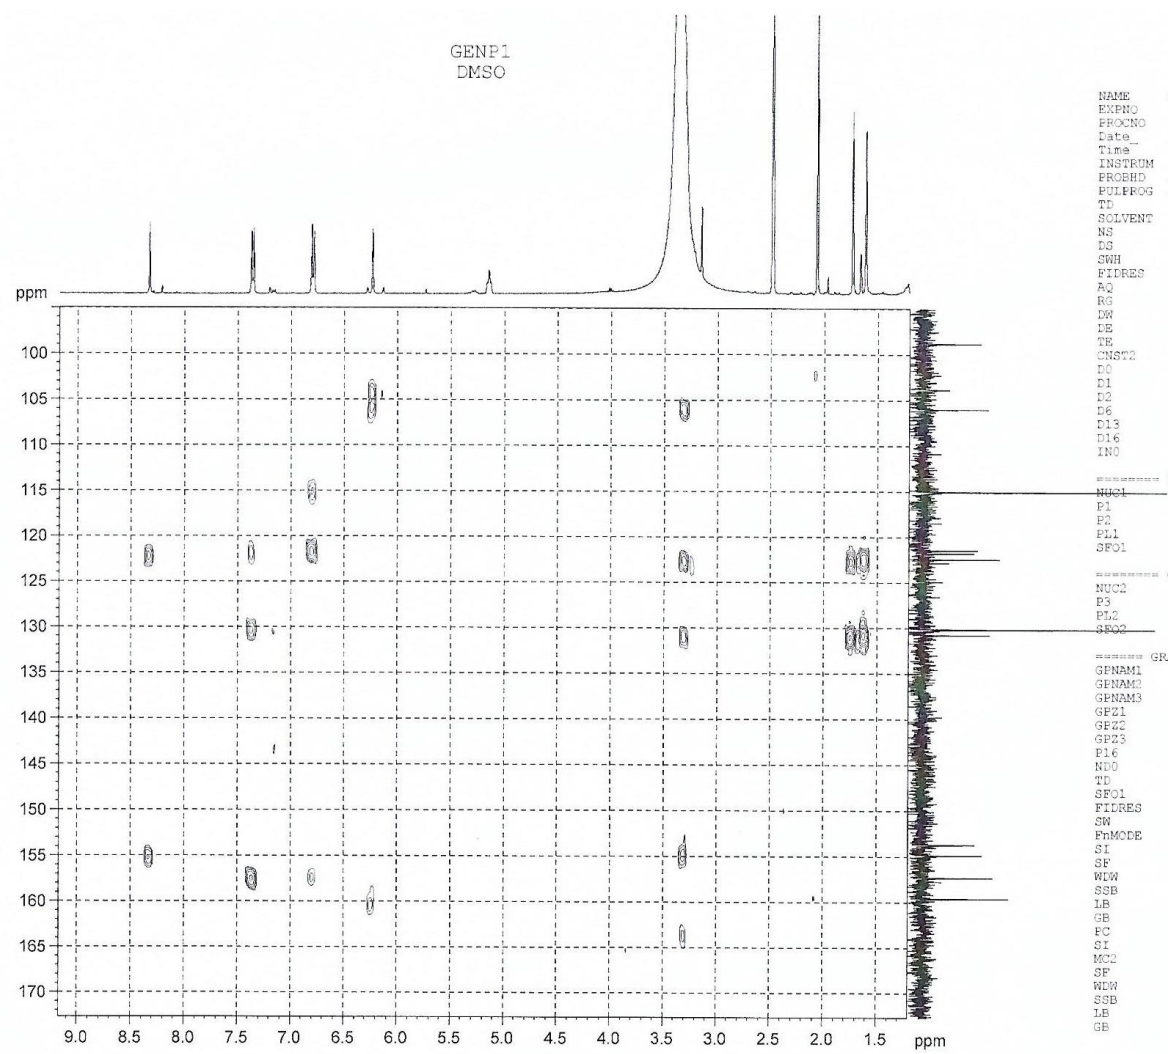

Figure S34. Zoom of 2D HMBC of 13.
